1 **Non-Coding and Loss-of-Function Coding Variants in *TET2* are Associated with Multiple**  
2 **Neurodegenerative Diseases**

3  
4 J. Nicholas Cochran,<sup>1</sup> Ethan G. Geier,<sup>2</sup> Luke W. Bonham,<sup>2</sup> J. Scott Newberry,<sup>1</sup> Michelle D. Amaral,<sup>1</sup>  
5 Michelle L. Thompson,<sup>1</sup> Brittany N. Lasseigne,<sup>1</sup> Anna M. Karydas,<sup>2</sup> Erik D. Roberson,<sup>3</sup> Gregory M. Cooper,<sup>1</sup>  
6 Gil D. Rabinovici,<sup>2,4</sup> Bruce L. Miller,<sup>2</sup> Richard M. Myers,<sup>1\*</sup> Jennifer S. Yokoyama<sup>2\*</sup>

7  
8 <sup>1</sup> HudsonAlpha Institute for Biotechnology, Huntsville, AL, 35806, United States

9 <sup>2</sup> Memory and Aging Center, Department of Neurology, University of California, San Francisco, San  
10 Francisco, CA 94158, United States

11 <sup>3</sup> Center for Neurodegeneration and Experimental Therapeutics, Alzheimer's Disease Center, Departments  
12 of Neurology and Neurobiology, University of Alabama at Birmingham, Birmingham, AL USA 35294

13 <sup>4</sup> Department of Radiology and Biomedical Imaging, University of California, San Francisco, San Francisco,  
14 CA 94158, United States

15  
16 \*Richard M. Myers and Jennifer S. Yokoyama contributed equally.

17  
18 Correspondence: [Jennifer.Yokoyama@ucsf.edu](mailto:Jennifer.Yokoyama@ucsf.edu)

19

20 **ABSTRACT**

21 We conducted genome sequencing to search for rare variation contributing to early onset Alzheimer's  
22 disease (EOAD) and frontotemporal dementia (FTD). Discovery analysis was conducted on 493 cases and  
23 671 controls of European ancestry. Burden testing for rare variation associated with disease was  
24 conducted using filters based on variant rarity (less than 1 in 10,000 or private), computational prediction of  
25 deleteriousness (CADD 10 or 15 thresholds), and molecular function (protein loss-of-function only, coding  
26 alteration only, or coding plus non-coding variants in experimentally predicted regulatory regions).  
27 Replication analysis was conducted on 16,871 independent cases and 15,941 independent controls. Rare  
28 variants in *TET2* were enriched in the discovery combined EOAD and FTD cohort ( $p=6.5 \times 10^{-8}$ , genome-  
29 wide corrected  $p=0.0037$ ). Most of these variants were canonical loss-of-function or non-coding in  
30 predicted regulatory regions. This enrichment replicated across several cohorts of AD and FTD (replication  
31 only  $p=0.0071$ ). The combined analysis odds ratio was 2.2 (95% CI 1.5–3.2) for AD and FTD. The odds  
32 ratio for qualifying non-coding variants considered independently from coding variants was 2.1 (95% CI  
33 1.2–3.9). For loss-of-function variants, the combined odds ratio (for AD, FTD, and amyotrophic lateral  
34 sclerosis, which shares clinicopathological overlap with FTD) was 3.2 (95% CI 2.0–5.3). *TET2* catalyzes  
35 DNA demethylation. Given well-defined changes in DNA methylation that occur during aging, rare variation  
36 in *TET2* may confer risk for neurodegeneration by altering the homeostasis of key aging-related processes.  
37 Additionally, our study emphasizes the relevance of non-coding variation in genetic studies of complex  
38 disease.  
39

## 40 INTRODUCTION

41 Neurodegeneration with a clinical onset prior to the age of 65 can be devastating for patients, their  
42 families, and caregivers, imposing financial burden and hardship during a period of life when individuals are  
43 often most productive<sup>1</sup>. Early-onset neurodegenerative diseases such as early-onset Alzheimer's disease  
44 (EOAD) and frontotemporal dementia (FTD) are typically thought of as disease forms with highly penetrant  
45 genetic contributions, and indeed both can result from Mendelian pathogenic mutations (with Mendelian  
46 causes more common in FTD)<sup>2</sup>. However, these diseases exhibit a high degree of heritability that remains  
47 unexplained by currently known genetic contributors<sup>3; 4</sup>. This suggests that additional genetic factors likely  
48 contribute to disease but have not yet been identified. Despite attempts at genome-wide association study  
49 (GWAS) of relatively sizeable cohorts, only modest association signals have been identified for FTD<sup>5</sup> and  
50 one form of EOAD, posterior cortical atrophy<sup>6</sup>. In contrast, sequencing studies have been successful at  
51 identifying more moderately to highly penetrant contributions to disease by examining rare variation.  
52 Successes in Alzheimer's disease (AD) include *ABCA7*, *SORL1*, and *TREM2* (reviewed in <sup>7</sup>). Similar  
53 successes for the amyotrophic lateral sclerosis (ALS)-FTD spectrum include *TBK1*<sup>8</sup>, *MFSD8*<sup>9</sup>, *DPP6*,  
54 *UNC13A*, and *HLA-DQA2*<sup>10</sup>. Despite these successes, the rarity of these diseases along with the high cost  
55 of sequencing studies has resulted in limited sample sizes of patient cohorts. Furthermore, prior studies  
56 have focused on coding regions of the genome, leaving non-coding regions largely unexplored for their  
57 contribution to disease risk.

58 Here we leveraged a large cohort of 683 patients, many of which have an early age of disease  
59 onset (<65), and 856 healthy adult controls (with no known neurological abnormalities) that have  
60 undergone genome sequencing to probe both coding and non-coding rare and predicted deleterious  
61 variants across the genome for association with disease risk. We assessed variant associations between  
62 EOAD and FTD vs. controls both separately and together (all cases versus controls), with the hypothesis  
63 that genetic pleiotropy—where variation in a single gene associates with multiple, different phenotypes—  
64 may play a role, as previously described for neurodegenerative diseases<sup>11-15</sup>.

65

## 66 **METHODS**

### 67 *Sample selection*

68           The majority of cases were selected from the University of California, San Francisco (UCSF)  
69 Memory and Aging Center with an intentional selection of early-onset cases when possible to maximize the  
70 likelihood of identifying genetic contributors, along with healthy older adult controls (a total of 664 cases  
71 and 102 controls, with 71 of these cases previously described in <sup>9</sup>). All UCSF cases and controls were  
72 clinically assessed using methods described in <sup>9</sup>. This cohort was intentionally depleted of cases with  
73 known Mendelian variants associated with neurodegenerative diseases, and any cases with known  
74 Mendelian variants identified after genome sequencing were excluded (see **Results**). A small number of  
75 samples (19 cases and 21 controls) were obtained from the University of Alabama at Birmingham (UAB)  
76 from an expert clinician who employed the same diagnostic procedures (case studies described in <sup>16</sup>). The  
77 resulting cohort was enriched for early-onset cases with a median age of presentation of 60 (range 45–84)  
78 for AD and 66 (range 29–89) for FTD. Additional neurologically healthy controls sequenced at  
79 HudsonAlpha were also included from two cohorts: a healthy aging control set from the National Institute of  
80 Mental Health (NIMH) (132 controls) and healthy unaffected parents from a childhood disease study where  
81 *de novo* mutations are the most common cause of disease<sup>17</sup>, making these parents reasonably  
82 representative population controls (601 controls). All participants or their surrogates provided written  
83 informed consent to participate in this study and the institutional review boards at each site approved all  
84 aspects of the study.

85

### 86 *Genome sequencing*

87           The majority of genome sequencing was performed at the HudsonAlpha Institute for Biotechnology  
88 on the Illumina HiSeq X platform (1,468 samples from UCSF, UAB, NIMH, and HudsonAlpha), while a  
89 small subset was sequenced at the New York Genome Center, also on the HiSeq X platform (71 samples  
90 from UCSF, described previously in <sup>9</sup>). Mean depth was 34X with an average of 92% of bases covered at  
91 20X. Sequencing libraries at HudsonAlpha were prepared by Covaris shearing, end repair, adapter ligation,  
92 and PCR using standard protocols. Library concentrations were normalized using KAPA qPCR prior to

93 sequencing. All variants meeting either Mendelian diagnostic criteria or variants in top hits from the  
94 discovery cohort were validated by Sanger sequencing.

95

#### 96 *Data quality control*

97 All sequencing reads from both sequencing centers were aligned to the hg19 reference genome  
98 with bwa-0.7.12<sup>18</sup>. BAMs were sorted and duplicates were marked with Sambamba 0.5.4<sup>19</sup>. Indels were  
99 realigned, bases were recalibrated, and gVCFs were generated with GATK 3.3<sup>20</sup>. Variants were called  
100 across all samples in a single batch with GATK 3.8 using the -newQual flag to minimize false negative  
101 singleton calls. The VCF was quality filtered with a genotype level requirement for 95% of sites to have a  
102 minimum GQ of 20 and DP of 10 (applied using VCFtools 0.1.15<sup>21</sup>), and a variant level filter of VQSLOD > -  
103 3. The small number of missing genotypes remaining after that quality filtering step were assumed to be  
104 reference (filled with bcftools 1.6-19<sup>22</sup>) in order to avoid errors in downstream processing using the package  
105 GEMINI 0.20.2<sup>23</sup> which adds missing genotypes to non-reference counts with its burden function. Goleft  
106 indexcov 0.1.17<sup>24</sup> was used for sex checks and samples failing sex checks were excluded. KING 2.1.2<sup>25</sup>  
107 was used to check for familial relationships and related individuals (up to 4<sup>th</sup> degree relatives using IBD  
108 segment analysis) were excluded. Ancestry was elucidated by both principal component analysis using  
109 plink 1.9<sup>26</sup> compared to 1000 genomes data<sup>27</sup> (using common variation overlapping with 1000 genomes  
110 calls) and analysis using ADMIXTURE 1.3.0<sup>28</sup> (**Supplemental Figure 1**), and only samples from the largest  
111 cluster (European ancestry) were retained for discovery analysis to minimize potential confounding  
112 population effects.

113

#### 114 *Annotation, filtering, and burden analysis*

115 In order to facilitate annotation and burden analysis, multi-allelic sites were split using Vt<sup>29</sup>. All  
116 variants were annotated with CADD v1.3<sup>30</sup>, including all indels. SnpEff 4.3s<sup>31</sup> was used to annotate with the  
117 GRCh37.75 gene model. Population database frequency annotations included 1000 genomes phase 3,  
118 TOPMed Bravo<sup>32</sup> (lifted over from hg38 to hg19 using CrossMap 0.2.7<sup>33</sup>), and several population database  
119 sets annotated using WGS 0.7<sup>34</sup> including ExAC<sup>35</sup>, gnomAD<sup>36</sup>, ESP, and UK10K. Variants were also  
120 annotated with dbSNP release 151<sup>37</sup>. A final important annotation set was the union of regions called by

121 GenoSkyline-Plus<sup>38</sup> as potential regulatory regions. GenoSkyline-Plus incorporates chromatin marks, DNA  
122 accessibility, RNA-seq, and DNA methylation to predict function. All tracks derived from direct human  
123 tissue sources were included (sources propagated in culture were excluded), with a total of 50 of 66 tissue  
124 and cell types described in Table S2 of<sup>38</sup> used for annotation (see **Supplemental Table 1** for included  
125 epigenome tracks in the union).

126 Variants were filtered using SnpSift 4.3s. In addition to the quality filters described, variants were  
127 further filtered by local and population frequency, predicted deleteriousness (CADD v1.3), and  
128 segmentation for function. To enrich for rare variation, variants were pre-filtered for a maximum minor allele  
129 count of 3 (approximately 0.1% local allele frequency), and a maximum allele frequency of 1 in 10,000 in  
130 any population included in the aforementioned population databases. In addition, non-coding variants were  
131 more strictly filtered to only variants present in a GenoSkyline-Plus qualifying region as described above  
132 and required to be absent from dbSNP 151.

133 From the initial pre-filtered file, we conducted further filtering to arrive at nine total filter conditions.  
134 First, we evaluated variants meeting either: 1 in 10,000 population cutoffs and CADD score greater than 10  
135 or 15, or: private variation and CADD score greater than 10 or 15; for a total of four conditions that include  
136 non-coding variants. We also confined to coding variants with the same allele frequency combinations and  
137 CADD cutoffs listed for four total coding-only conditions. For canonical loss-of-function, we only considered  
138 the base 1 in 10,000 allele frequency requirement and CADD 10 cutoff for a total of one canonical loss-of-  
139 function condition (also note that all canonical loss-of-function variants meeting these criteria were included  
140 in the other eight filter conditions regardless of allele frequency or CADD cutoff given the known  
141 deleteriousness of canonical loss-of-function variants). We note that these are extensively overlapping test  
142 sets (See **Supplemental Figure 2** for correlations), and thus often yield similar results. For example, all  
143 conditions constrained to private variation will be a subset of matched conditions with 1 in 10,000  
144 population frequency cutoffs, and all coding-only conditions are a subset of the conditions that allow rare  
145 non-coding variation.

146 A VCF for each of the nine filtering conditions was loaded into a GEMINI 0.20.2 database<sup>23</sup>, which  
147 was used to aggregate counts of variants for each individual by gene. By default, GEMINI is constrained to  
148 coding variation, so GEMINI python scripts were edited to allow for counting of variants in non-coding

149 regions as well. Variants upstream or downstream (within 5kb, the SnpEff default) were also assigned to  
150 their adjacent genes. The number of qualifying individuals was the final count unit, where one or more  
151 qualifying variants in a gene for a given individual resulted in that individual having a qualifying count for  
152 that gene (i.e., if an individual had two qualifying variants, they would still only be counted once to account  
153 for the possibility of a recessive model of inheritance or negligibility of the 2<sup>nd</sup> variant if on the same allele).  
154 Individuals with more than three qualifying variants in a gene were not counted as qualifying because an  
155 excess of rare and predicted damaging variants in a single gene may be indicative of a sequencing or  
156 variant-calling error.

157

### 158 *Burden analysis statistics*

159 In order to assess the effect of covariates for the discovery set as well as any replication sets where  
160 the necessary covariate data were available, we tested using SKAT 1.3.2.1<sup>39</sup> using the adaptive efficient  
161 re-sampling method corrected for sex, number of *APOE*  $\epsilon$ 4 alleles, the first four principal components from  
162 common variant PCA, and ancestral proportions from ADMIXTURE with k=5. Statistical significance was  
163 set at a corrected  $p$ -value < 0.05. Because of the three main clusters of filter conditions corresponding to  
164 case-control test sets (EOAD vs. control, FTD vs. control, or all cases vs. control) (**Supplemental Figure**  
165 **2**), we applied a correction factor of three to all protein coding genes in hg19 put forth by the HUGO Gene  
166 Nomenclature Committee (19,118 genes, **Supplemental Table 2**) for a correction factor for  $p$  values in the  
167 discovery analysis of 57,354. In order to allow for use of replication cohorts where covariate data was not  
168 available, we also utilized a two-sided Fisher's exact test. SKAT and Fisher's tests were highly correlated  
169 (Pearson's  $r=0.76$  of log transformed  $p$  values).

170

### 171 *Clinical rate of progression analysis*

172 Our study utilized genetic and longitudinal clinical data from the Alzheimer's Disease Neuroimaging  
173 Initiative (ADNI) to study the clinical profiles and progression of *TET2* rare variant carriers. ADNI is a multi-  
174 center prospective longitudinal cohort study created to study the genetic, clinical, and imaging correlates of  
175 Alzheimer's disease<sup>40-42</sup>, and ADNI cases are present in the Alzheimer's Disease Sequencing Project  
176 (ADSP) replication cohort. Every study participant undergoes a thorough assessment that includes clinical

177 characteristics, cognitive testing, and genetic sequencing. Participants were diagnosed as either normal  
178 controls (CN), mild cognitive impairment (MCI), or Alzheimer's disease (AD) (note that some participants  
179 progressed from MCI to AD while being followed, with the last assessment used for case designation in the  
180 replication analysis, while they may be designated as beginning at the MCI stage in the following analysis).  
181 For clinical rate of progression analysis we used the Clinical Dementia Scale Sum of Boxes Score  
182 (CDRSB)<sup>43</sup>, a broad measure of clinical progression and impairment well-validated in multiple studies<sup>44, 45</sup>.

183 We used linear mixed-effects modeling to test whether variation in *TET2* predicts longitudinal  
184 clinical progression using R version 3.5.2. We covaried for baseline age, sex, education, and CDRSB score  
185 as well as *APOE*  $\epsilon$ 4 dose. The model was implemented as follows:  $\Delta \text{CDRSB} = \beta_0 + \beta_1 \text{Age}_{\text{baseline}} \times \Delta t +$   
186  $\beta_2 \text{Sex}_{\text{female}} \times \Delta t + \beta_3 \text{Education}_{\text{baseline}} \times \Delta t + \beta_4 \text{CDRSB}_{\text{baseline}} \times \Delta t + \beta_5 \text{APOE } 4_{\text{dose}} \times \Delta t + \beta_6 \text{TET2}_{\text{carrier status}} \times \Delta t +$   
187  $(1|\text{subject}) + \epsilon$

188

## 189 RESULTS

190 Of the 1,539 samples in the original set, a total of 73 samples were removed from analysis after  
191 quality control. Two failed sex checks; 27 were pruned for relatedness; 12 were pruned due to an  
192 identifiable Mendelian variant (all of which were Sanger validated) meeting American College of Medical  
193 Genetics pathogenic or likely pathogenic criteria, including one *C9orf72* expansion carrier from the UAB  
194 set; one control was pruned for conversion to Mild Cognitive Impairment (MCI) after enrollment; and 31  
195 cases were pruned because of phenotypic uncertainty or diagnosis of MCI or Parkinson's disease (PD)  
196 rather than EOAD or FTD on re-evaluation after enrollment. The remaining dataset consisted of 1,466  
197 individuals: 638 cases (294 EOAD and 344 FTD) and 828 controls. Of these cases and controls, 302 were  
198 of non-European ancestry (determined by principal component and admixture analysis, **Supplemental**  
199 **Figure 1**). Non-European ancestry individuals were excluded from the discovery set to reduce  
200 heterogeneity but were retained for replication. The resultant discovery set consisted of 1,164 individuals of  
201 European ancestry: 493 cases (228 EOAD and 265 FTD) and 671 controls. All demographic available  
202 information for each sample (case category, primary clinical diagnosis, sex, age at enrollment, *APOE*  $\epsilon$ 4  
203 status, self-reported race/ethnicity, and principal components 1–4 and 5 ADMIXTURE coefficients) is  
204 available in **Supplemental Table 3**. The majority of cases were clinically diagnosed and did not have



205 autopsy material available for neuropathological sub-grouping at the time of analysis. Primary clinical  
206 diagnoses included as AD were logopenic variant primary progressive aphasia (29), posterior cortical  
207 atrophy (26), frontal AD (17), language AD (17), vascular AD (8), AD + dementia with Lewy bodies (DLB)  
208 (5), and AD not otherwise specified (126). Primary clinical diagnoses included as FTD were behavioral  
209 variant FTD (83), corticobasal syndrome (65), nonfluent variant primary progressive aphasia (43), FTD +  
210 ALS (20), primary supranuclear palsy (17), semantic variant primary progressive aphasia (17), argyrophilic  
211 grain disease (5), and FTD not otherwise specified (15). The expected enrichment in *APOE*  $\epsilon$ 4 was  
212 observed in AD cases (58% with at least one *APOE*  $\epsilon$ 4 allele versus 28% in controls,  $*p=1.8 \times 10^{-16}$  by  
213 Fisher's exact test), but not in FTD (28% in FTD and controls,  $p=0.87$ ).

214 We compared EOAD vs. control, FTD vs. control, or a combined analysis of EOAD and FTD vs.  
215 control across all variant filtering conditions (see Methods). In the discovery analysis of combined burden  
216 across EOAD and FTD vs. control, with variants absent from population databases and with a CADD score  
217  $> 10$  (including non-coding variants in GenoSkyline-Plus regions), one gene-disease association passed  
218 the multiple comparison significance threshold: *TET2* (SKAT uncorrected  $p=6.5 \times 10^{-8}$ , corrected  $p=0.0037$ ;  
219 **Table 1**, model corrects for number of *APOE*  $\epsilon$ 4 alleles, sex, principal components 1–4, and 5  
220 ADMIXTURE ancestral proportions). Note that, while we applied a multiple correction cutoff of 57,354  
221 based on three main clusters of correlated filter conditions (**Supplemental Figure 2**), the  $p$  value for *TET2*  
222 would also pass a strict Bonferroni correction for 516,186 implicit tests (19,118 genes, 27 filter conditions) if  
223 we conservatively did not consider the correlated nature of the different filter sets (Bonferroni  $p=0.033$ ).  
224 Statistical tests separately comparing EOAD vs. control and FTD vs. control did not pass the same degree  
225 of multiple testing correction but results for those comparisons are provided in **Supplemental Tables 4**  
226 (EOAD) **and 5** (FTD) and demonstrate that the nominal enrichment level in *TET2* is similar in both EOAD  
227 and FTD. No other gene reached even nominal significance ( $p < 1 \times 10^{-5}$ ) in any filter condition, so *TET2*  
228 was the only gene considered for replication analysis. However, in the interest of making data from this  
229 study highly available, counts and  $p$  values for all genes assessed are provided in **Supplemental Table 6**.

230 All qualifying variants in cases for *TET2* were both Sanger validated and visually evaluated in the  
231 Integrative Genomics Viewer (IGV). Two variants failed Sanger validation (adjacent erroneous indel calls in  
232 a single sample) and were excluded from the variant counts in **Table 1**, all statistics, and in **Supplemental**

233 **Table 7** where all qualifying variants in *TET2* are listed. In addition, two cases had adjacent variant calls  
234 that were found to make up one variant. These were also corrected in all statistical analyses and tables.  
235 The single control with a qualifying *TET2* variant did not have material available for Sanger sequencing but  
236 appeared valid in IGV (a single nucleotide variant with 8 alternate allele reads among 18 total reads).

237 Next, we assessed potential confounding due to stratification by a QQ plot of the *p*-value  
238 distribution for the filter set that produced the top result and observed no genomic inflation consistent with a  
239 well-matched case-control dataset ( $\lambda = 0.95$ , **Figure 1**).

240 To help inform the types of sequencing datasets to target for replication, we assessed the variant  
241 type (coding or non-coding) and associated disease for all qualifying *TET2* variants in the discovery set.  
242 Qualifying variants were observed in 11 EOAD cases, eight FTD cases, and one control. Of the 11 EOAD  
243 cases, one had depressive symptoms, one had language symptoms and possible corticobasal syndrome,  
244 one had logopenic variant primary progressive aphasia, and one had a previous diagnosis of behavioral  
245 variant FTD revised to frontal AD (seven had no additional noted phenotypes). Of the eight FTD cases,  
246 three had corticobasal syndrome (one of whom had AD symptoms and possible posterior cortical atrophy),  
247 one had FTD + ALS, and four had behavioral variant FTD (one with AD symptoms and one with seizures).  
248 Nine cases in total harbored coding variants, seven of which were canonical loss-of-function variants (four  
249 EOAD and three FTD). Because non-coding variants make up a large portion of the signal, we assessed  
250 coding and non-coding variants separately. We observed a similar level of enrichment for both coding and  
251 non-coding variants in EOAD and FTD cases when these types of variants were considered independently  
252 of one another (**Figure 2A**). Furthermore, the non-coding variants were prevalent in regions predicted to  
253 have regulatory function (**Figure 2B**). Combined with the high number of canonical loss-of-function  
254 variants, these data support a model whereby *TET2* haploinsufficiency, resulting from either canonical loss-  
255 of-function variation or expression-altering non-coding variation, may contribute risk to neurodegenerative  
256 disease.

257 To replicate this finding, we used six additional cohorts (five independent, one internal) with  
258 available sequencing data from patients diagnosed with a neurodegenerative disorder and healthy controls.  
259 Based on the variants discovered in *TET2*, we attempted to replicate the association between aggregate  
260 rare variant burden in *TET2* and disease risk using two arms: the same conditions used in discovery

261 applied to other genome sequencing datasets as a primary measure, and canonical loss-of-function only  
262 analysis as a secondary measure to allow for incorporation of exome sequencing datasets. We assessed  
263 three cohorts with genome sequencing data for replication using the same conditions applied in the  
264 discovery set: ADSP (the Alzheimer's Disease Sequencing Project) (2,208 late-onset AD (LOAD) cases  
265 and 2,208 controls), the Accelerating Medicines Partnership – Alzheimer's Disease (AMP-AD) cohort (749  
266 LOAD, 184 FTD, and 446 controls), and the non-European ancestry individuals from our cohort not  
267 assessed in the discovery set (66 EOAD, 79 FTD, and 157 controls). Assessment of these three cohorts  
268 revealed replication of the signal for *TET2* overall for early- and late-onset AD and FTD combined vs.  
269 control ( $p=0.0071$ ; **Table 1**). Although the statistics for separate analyses of EOAD vs. control and FTD vs.  
270 control did not meet significance criteria, secondary analysis of those subgroups revealed similar levels of  
271 enrichment within each distinct condition (**Supplemental Table 4** (EOAD) and **Supplemental Table 5**  
272 (FTD)). Because of the established genetic overlap between FTD and ALS<sup>46</sup>, we also assessed variants in  
273 Project MinE<sup>47</sup> (4,366 ALS cases and 1,832 controls) and observed a non-significant trend towards a slight  
274 enrichment in ALS cases (OR 1.3, 95% CI 1.1–2.7; **Supplemental Table 5**). While not a formal replication  
275 because no ALS cases were included in the discovery set, we present these findings in **Supplemental**  
276 **Table 5** along with FTD statistics.

277 Finally, we assessed predicted loss-of-function variants alone in all aforementioned cohorts (UCSF  
278 European discovery set, UCSF non-European replication set, ADSP, AMP-AD, Project MinE) along with  
279 exome sequencing data from a second ALS dataset<sup>8</sup> and additional exome samples from ADSP<sup>48</sup> for a  
280 total of seven sample sets. We observed a robust signal for association between predicted canonical loss-  
281 of-function variants and disease across multiple disease cohorts (**Table 2**). Specifically, three of the four  
282 largest independent replication cohorts (ADSP genomes (LOAD), ADSP exomes (LOAD), and HA-Duke-  
283 Stanford ALS exomes) all exhibit independent nominal replication ( $p<0.05$ ). Meta-analysis of all canonical  
284 loss-of-function variants from all available cohorts (across EOAD, LOAD, FTD, and ALS) yields a  $p$ -value  
285 below commonly used exome-wide significance cutoffs ( $p=2.5\times 10^{-7}$ ; **Table 2**), and subgroup analyses of  
286 both AD and FTD–ALS vs. controls were each nominally significant ( $p<0.05$ ) and suggest similar degrees  
287 of enrichment.

288 To assess potential clinical implications of rare variation in *TET2*, we queried the Alzheimer's  
289 Disease Neuroimaging Initiative (ADNI) dataset<sup>40-42</sup>, which includes clinical rate of progression data. We  
290 used linear mixed-effects modeling to test whether qualifying rare variation (based on the discovery  
291 condition that passed multiple corrections testing) in *TET2* predicts longitudinal clinical progression. We  
292 covaried for baseline age, sex, education, and CDRSB score as well as *APOE*  $\epsilon$ 4 dose. A total of 786  
293 ADNI participants had *TET2* genotypes available for analysis. There was no significant difference in the  
294 distribution of *TET2* rare variant carriers by sex, *APOE*  $\epsilon$ 4 dose, education, or baseline CDRSB score  
295 (**Supplemental Table 8**). There was a significant difference between *TET2* rare variant carriers and non-  
296 carriers by baseline age (**Supplemental Table 8**) but recall that baseline age is corrected for as a  
297 covariate along with sex, education, *APOE*  $\epsilon$ 4 dose, and baseline CDRSB score. Using linear mixed effects  
298 regression, we found a significant relationship between carrying any *TET2* rare variant and clinical  
299 progression as measured by change in CDRSB score ( $\beta \pm SE = 0.14 \pm 0.06$ ;  $*p=0.03$ ) (**Figure 3**). A similar  
300 finding was observed when our analyses were limited to *TET2* loss-of-function variant carriers ( $\beta \pm SE =$   
301  $0.17 \pm 0.09$ ;  $*p=0.04$ ) (**Supplemental Figure 3**) (although we corrected for covariates for rigor, no  
302 covariates were significantly associated with *TET2* loss-of-function carrier status (**Supplemental Table 9**)).  
303 We also explored whether rare variation in *TET2* predicted changes in CDRSB and cognition (measured by  
304 Mini Mental State Exam (MMSE) score changes<sup>49</sup>) in MCI and control when analyzed separately. To  
305 maximize sample size, we limited this analysis to all *TET2* variant carriers without further subdivision to  
306 loss-of-function variant carriers. When constraining the analysis to MCI, *TET2* rare variant carriers (n=8)  
307 demonstrated a greater CDRSB change over time compared to noncarriers of a higher magnitude and  
308 significance compared to the pooled analysis of control, MCI and AD ( $\beta \pm SE = 0.64 \pm 0.12$ ;  $*p=6.17 \times 10^{-8}$ )  
309 when correcting for the covariates outlined above. Of note, *TET2* rare variant carriers diagnosed with MCI  
310 also demonstrated greater decreases in MMSE changes when compared to non-carriers ( $\beta \pm SE = -0.47 \pm$   
311  $0.17$ ;  $*p=0.01$ ). Within controls (n=6), there were no significant associations between *TET2* variant carrier  
312 status and either CDRSB or MMSE.

313

314 **DISCUSSION**

315 In this study, we identified a significant excess of rare, likely deleterious variation in *TET2* as a risk  
316 factor for multiple neurodegenerative disorders, including EOAD, LOAD, FTD, and ALS. This finding is  
317 important for two main reasons. First, *TET2* plays an important role in the conversion of methylation to 5-  
318 hydroxymethylation, implicating dysfunction in a pathway known to be critical during aging<sup>50</sup> and learning  
319 and memory<sup>51</sup> in age-associated diseases like LOAD and FTD. Second, it is striking that the effect sizes in  
320 both coding and non-coding variant enrichments were comparable. This point suggests that further  
321 investigation of non-coding variation in complex disease genome sequencing studies holds potential for the  
322 identification of new contributors to disease.

323 *TET2* promotes de-methylation of DNA by catalyzing conversion of methylation to 5-  
324 hydroxymethylation, and is highly expressed in brain (reviewed in<sup>52</sup>). Defined methylation changes occur  
325 with age in humans (“Horvath’s clock”, reviewed in<sup>50</sup>) and there is some evidence for an association  
326 between increased “methylation age” and disease (systematically reviewed in<sup>53</sup>). Taken together, this  
327 raises speculation that reduced function or loss of *TET2*, a critical regulator in methylation processes, may  
328 have adverse age-associated effects. Evidence from mouse models further supports this idea. Specifically,  
329 promoting the conversion of methylation to 5-hydroxymethylation by either exercise-induced upregulation  
330 of *TET2*<sup>54</sup> or artificial overexpression of *TET2*<sup>55</sup> improves memory in mice by increasing neurogenesis in  
331 the dentate gyrus. Conversely, reducing *TET2* in mouse hippocampus leads to reduced neurogenesis and  
332 impaired memory<sup>55</sup>, consistent with its role in promoting adult neurogenesis in mice<sup>56</sup>. Finally, reduction of  
333 *TET2* in mouse primary neurons also reduced cell survival<sup>57</sup>. All of these observations are consistent with  
334 detrimental consequences of loss of *TET2* function and suggest that neurons may be particularly  
335 vulnerable to these effects. Further support for a generally important role of TET enzymes comes from a  
336 preprint implicating mono- and bi-allelic loss-of-function of *TET3* in childhood diseases<sup>58</sup> (*TET3* is more  
337 constrained against loss-of-function based on population database estimates<sup>35</sup>, which (along with bi-allelic  
338 contributions) could explain the earlier ages observed). In addition to general evidence for the importance  
339 of *TET2* and other TET enzymes, an intriguing and more specific role for *TET2* has also been proposed in  
340 a preprint implicating *TET2* in microglial response, particularly around amyloid plaques<sup>59</sup>, suggesting that  
341 *TET2* loss-of-function may prevent its recruitment into a protective role (similar to recent findings on  
342 *TREM2* suggesting that higher secreted *TREM2* levels are protective<sup>60</sup>, supporting a model where risk-

343 conferring *TREM2* variants result in loss-of-function). Finally, the human data we analyzed from ADNI is  
344 consistent with deleterious consequences of *TET2* rare variants, with our observations supporting a faster  
345 rate of both general clinical decline (CDRSB) and cognitive decline (MMSE).

346 The strongest association signal in the discovery cohort was a combined analysis across all EOAD  
347 and FTD cases together. While we recognize the drawbacks of a combined analysis across phenotypes,  
348 we argue that the benefits outweigh the drawbacks for two critical reasons beyond the increase in sample  
349 size: (1) known effects of genetic pleiotropy, and (2) the possibility of identifying shared pathways between  
350 diseases.

351 The first reason supporting comparison across EOAD and FTD is that genetic pleiotropy—where a  
352 single locus contributes variance to multiple, different phenotypes—may play a role in neurodegenerative  
353 disease risk. Our group and others have provided support for this idea through several studies investigating  
354 multiple neurodegenerative diseases using GWAS approaches<sup>11-15</sup>. In addition to common risk variants,  
355 there is clear evidence of moderately to highly penetrant rare variation in single genes conferring risk or  
356 causality for multiple neurodegenerative diseases. First, rare variants in *TREM2* confer risk for both AD<sup>61</sup>  
357 and FTD<sup>62</sup>. Second, rare variation in multiple established genes such as *TBK1* and *C9orf72* confer risk or  
358 are causative across the ALS-FTD spectrum<sup>63</sup>. Third, moderately penetrant common risk alleles like *APOE*  
359  $\epsilon 4$  are primarily associated with AD, but also associated with risk for Dementia with Lewy Bodies (DLB)<sup>64</sup>,  
360 FTD<sup>12</sup>, and age of onset in *C9orf72* carriers<sup>65</sup>. Fourth, *GBA* and *SNCA* were first identified as risk factors  
361 for Parkinson's disease (PD), but also confer risk for DLB<sup>64</sup>. Finally, rare pathogenic variants in *MAPT*  
362 typically cause FTD<sup>66, 67</sup>, but the R406W pathogenic variant has also been associated with an EOAD  
363 presentation<sup>68, 69</sup>. Furthermore, common variants near *MAPT* (tagging the H1 haplotype, associated with  
364 higher tau expression<sup>70</sup>) are associated with AD, PD, FTD, and ALS<sup>11; 12; 15</sup>.

365 A second important reason to analyze across different patient populations is that performing  
366 analyses across cohorts of patients diagnosed with different neurodegenerative disorders but with partially  
367 overlapping underlying neuropathology (i.e., tau-containing protein aggregates in both AD and  
368 approximately half of FTD cases; TDP-43 containing protein aggregates in ALS, approximately half of FTD  
369 cases, and some AD cases) may identify shared dysregulated pathways, and has the potential to identify  
370 therapeutic targets with relevance across multiple neurodegenerative diseases. Indeed, our discovery that

371 rare variation in *TET2* is associated with multiple neurodegenerative diseases suggests age-related  
372 changes in methylation may be relevant across a broad spectrum of neurodegeneration.

373 In conclusion, we provide evidence that loss of *TET2* function confers risk for EOAD, LOAD, FTD,  
374 and ALS. Specifically, we found that, in aggregate, both coding and non-coding qualifying rare variation in  
375 *TET2* is associated with approximately a 2-fold risk increase across diverse populations of patients with  
376 AD, FTD, and ALS, and that canonical loss-of-function variation in *TET2* is associated with approximately a  
377 3-fold risk increase for these diseases. We note that, similar to any burden test, it is impossible from  
378 aggregate enrichment values to deconvolute variable penetrance levels among disease-relevant alleles  
379 and the degree of enrichment for truly associated variation. Future work assessing the functional effects of  
380 particular alleles and their concomitant levels of risk to individual variant carriers would be helpful in this  
381 regard. Additionally, further work is required to understand the local and global mechanisms by which  
382 alterations to *TET2* levels and/or function contributes to disease risk, whether this risk is anchored to  
383 *TET2*'s effects on aging biology, and, if so, whether rare variation in *TET2* also confers risk to other age-  
384 associated neurodegenerative diseases.

385

## 386 **SUPPLEMENTAL DATA DESCRIPTION**

387 Supplemental data includes three figures and nine tables. The supplemental figures and two of the  
388 supplemental tables (4,5,8,9) are provided in the **Supplemental Data**. Four supplemental tables are  
389 provided in an Excel file (1,2,3,7), and 1 supplemental table (6) is provided as a zipped text file.

390

391

## 392 **ACKNOWLEDGEMENTS**

393

### 394 *Data availability*

395 All data in both discovery and replication sets are available through either an application for access  
396 by qualified researchers, or through public availability. In addition to providing information on how to access  
397 all datasets below, we have also included a supplemental text file with count data for all conditions  
398 assessed in the discovery cohort (**Supplemental Table 6**). Genome data for UCSF-enrolled participants is  
399 available to qualified researchers on request to the UCSF Memory and Aging Center

400 (<https://memory.ucsf.edu/research-trials/professional/open-science>). Genome data from University of  
401 Alabama at Birmingham–enrolled participants is available from the National Institute on Aging Genetics of  
402 Alzheimer's Disease Data Storage (NIAGADS) site under project NG00082. Data from control subjects  
403 sequenced at HudsonAlpha are available under dbGaP accessions phs001625.v1.p1 and  
404 phs001089.v3.p1. ADNI (Alzheimer's Disease Neuroimaging Initiative, part of the ADSP genomes batch  
405 call) and ADSP data are available at NIAGADS under projects NG00066 and NG00067 and on dbGaP  
406 under accession phs000572.v7.p4 (see Supplemental Extended Acknowledgements for all ADSP  
407 investigators and funding sources). Data from AMP-AD are available through controlled access to the  
408 AMP-AD Knowledge Portal on Synapse (DOI: 10.7303/syn2580853). Data from Project MinE are freely  
409 available online (<http://databrowser.projectmine.com/>)<sup>71</sup>. Summary statistics from<sup>8</sup> are freely available  
410 online. 1000 genomes data are freely available online (<http://www.internationalgenome.org/>)<sup>27</sup>.

411

#### 412 *Competing interests*

413 The authors declare that they have no relevant competing interests. GDR industry relationships:  
414 Research support from Avid Radiopharmaceuticals, Eli Lilly, GE Healthcare, Life Molecular Imaging.  
415 Consultant/SAB: Axon Neurosciences, Eisai, Merck. Speaking honorarium: GE Healthcare. Associate  
416 Editor, JAMA Neurology.

417

#### 418 *Funding*

419 Funding for genomes from UCSF-enrolled participants sequenced at HudsonAlpha was generously  
420 provided by donors to the HudsonAlpha Foundation Memory and Mobility Fund (RMM). Funding for  
421 genomes sequenced at the New York Genome Center was provided from grant support from the Rainwater  
422 Charitable Foundation (JSY). Funding for sequencing of genomes from the University of Alabama at  
423 Birmingham was provided by the Daniel Foundation of Alabama (EDR). Additional support was provided by  
424 the NIH-NIA K01 AG049152 (JSY), Larry L. Hillblom Foundation 2016-A-005-SUP (JSY), the Rainwater  
425 Charitable Foundation (JSY), NIA P01 AG1972403 (BLM), NIA P50 AG023501, NIA P30 AG062422  
426 (BLM), and R01 AG045611 (GDR).

427



428 *Authors' contributions*

429 Experimental design: JNC, EGG, LWB, GMC, BNL, GDR, BLM, RMM, JSY. Data collection: LWB,  
430 MDA, MLT, AMK, EDR, GDR, BLM, JSY. Data analysis and interpretation: JNC, EGG, LWB, JSN, BNL,  
431 GMC, RMM, JSY. Subject recruitment: EDR, GDR, BLM. Technical or administrative support: JSN, LWB,  
432 AMK. Writing the manuscript: JNC, EGG, LWB, JSY. Editing the manuscript: JNC, EGG, LWB, MLT, BNL,  
433 EDR, GDR, RMM, JSY.

434

435 *Acknowledgements*

436 We thank the Genomic Services Lab at HudsonAlpha for DNA isolations, library generation, quality  
437 control and sequencing. We also acknowledge a key contribution from the availability of datasets through  
438 controlled access, without which replication for this study would not have been possible. In addition to  
439 referencing how to access these sets in the *Data availability* section, we reiterate our appreciation for these  
440 datasets here: ADSP, ADNI, the AMP-AD Knowledge Portal (doi:10.7303/syn2580853) (with contributions  
441 from ROSMAP<sup>72</sup>, Mayo<sup>73</sup>, and MSBB), the Project MinE Sequencing Consortium<sup>47</sup>, and HA-Duke-Stanford  
442 ALS exomes<sup>8</sup>. More detail on contributing studies is listed below, and the full list of contributors for ADSP  
443 and ADNI as listed in the Supplemental Acknowledgements because of space limitations.

444 CSER: dbGaP accession phs001089.v3.p1 contains data generated by the Clinical Sequencing  
445 Exploratory Research (CSER) Consortium established by the NHGRI. Funding support for CSER was  
446 provided through cooperative agreements with the NHGRI and NCI through grant numbers U01 HG007301  
447 (Genomic Diagnosis in Children with Developmental Delay). Information about CSER and the investigators  
448 and institutions who comprise the CSER consortium can be found at <https://cser-consortium.org>.

449 NIMH: The results published here are in whole or part based upon data generated by the Pritzker  
450 Neuropsychiatric Disorders Research Consortium at the HudsonAlpha Institute for Biotechnology. Funding  
451 support was provided by the Pritzker Neuropsychiatric Disorders Research Consortium. A case-control  
452 study was conducted to assay rare, predicted deleterious genetic variants in patients who have psychotic  
453 major depression. The data that is provided is genome sequencing of the control samples (unaffected)  
454 from this study, which originated from the Molecular Genetics of Schizophrenia samples (Study #29 in the  
455 NIMH repository).

456 ROSMAP: Study data were provided by the Rush Alzheimer's Disease Center, Rush University  
457 Medical Center, Chicago. Data collection was supported through funding by NIA grants P30AG10161,  
458 R01AG15819, R01AG17917, R01AG30146, R01AG36836, U01AG32984, U01AG46152, U01AG61356,  
459 the Illinois Department of Public Health, and the Translational Genomics Research Institute.

460 Mayo RNA-Seq genome sequencing data: Study data were provided by the following sources: The  
461 Mayo Clinic Alzheimers Disease Genetic Studies, led by Dr. Nilufer Taner and Dr. Steven G. Younkin,  
462 Mayo Clinic, Jacksonville, FL using samples from the Mayo Clinic Study of Aging, the Mayo Clinic  
463 Alzheimers Disease Research Center, and the Mayo Clinic Brain Bank. Data collection was supported  
464 through funding by NIA grants P50 AG016574, R01 AG032990, U01 AG046139, R01 AG018023, U01  
465 AG006576, U01 AG006786, R01 AG025711, R01 AG017216, R01 AG003949, NINDS grant R01  
466 NS080820, CurePSP Foundation, and support from Mayo Foundation. Study data includes samples  
467 collected through the Sun Health Research Institute Brain and Body Donation Program of Sun City,  
468 Arizona. The Brain and Body Donation Program is supported by the National Institute of Neurological  
469 Disorders and Stroke (U24 NS072026 National Brain and Tissue Resource for Parkinsons Disease and  
470 Related Disorders), the National Institute on Aging (P30 AG19610 Arizona Alzheimers Disease Core  
471 Center), the Arizona Department of Health Services (contract 211002, Arizona Alzheimers Research  
472 Center), the Arizona Biomedical Research Commission (contracts 4001, 0011, 05-901 and 1001 to the  
473 Arizona Parkinson's Disease Consortium) and the Michael J. Fox Foundation for Parkinsons Research.

474 MSBB: These data were generated from postmortem brain tissue collected through the Mount Sinai  
475 VA Medical Center Brain Bank (MSBB) and were provided by Dr. Eric Schadt from Mount Sinai School of  
476 Medicine.

477

478 **REFERENCES**

- 479 1. Lambert, M.A., Bickel, H., Prince, M., Fratiglioni, L., Von Strauss, E., Frydecka, D., Kiejna, A., Georges,  
480 J., and Reynish, E.L. (2014). Estimating the burden of early onset dementia; systematic review of  
481 disease prevalence. *Eur. J. Neurol.* 21, 563–569.
- 482 2. Loy, C.T., Schofield, P.R., Turner, A.M., and Kwok, J.B. (2014). Genetics of dementia. *Lancet* 383, 828–  
483 840.
- 484 3. Goldman, J.S., Farmer, J.M., Wood, E.M., Johnson, J.K., Boxer, A., Neuhaus, J., Lomen-Hoerth, C.,  
485 Wilhelmsen, K.C., Lee, V.M., Grossman, M., et al. (2005). Comparison of family histories in FTLTD  
486 subtypes and related tauopathies. *Neurology* 65, 1817–1819.
- 487 4. Wingo, T.S., Lah, J.J., Levey, A.I., and Cutler, D.J. (2012). Autosomal recessive causes likely in early-  
488 onset Alzheimer disease. *Arch. Neurol.* 69, 59–64.
- 489 5. Ferrari, R., Hernandez, D.G., Nalls, M.A., Rohrer, J.D., Ramasamy, A., Kwok, J.B., Dobson-Stone, C.,  
490 Brooks, W.S., Schofield, P.R., Halliday, G.M., et al. (2014). Frontotemporal dementia and its  
491 subtypes: a genome-wide association study. *Lancet neurology* 13, 686–699.
- 492 6. Schott, J.M., Crutch, S.J., Carrasquillo, M.M., Uphill, J., Shakespeare, T.J., Ryan, N.S., Yong, K.X.,  
493 Lehmann, M., Ertekin-Taner, N., Graff-Radford, N.R., et al. (2016). Genetic risk factors for the  
494 posterior cortical atrophy variant of Alzheimer's disease. *Alzheimers Dement.* 12, 862–871.
- 495 7. Nicolas, G., Charbonnier, C., and Campion, D. (2016). From Common to Rare Variants: The Genetic  
496 Component of Alzheimer Disease. *Hum. Hered.* 81, 129–141.
- 497 8. Cirulli, E.T., Lasseigne, B.N., Petrovski, S., Sapp, P.C., Dion, P.A., Leblond, C.S., Couthouis, J., Lu,  
498 Y.F., Wang, Q., Krueger, B.J., et al. (2015). Exome sequencing in amyotrophic lateral sclerosis  
499 identifies risk genes and pathways. *Science* 347, 1436–1441.
- 500 9. Geier, E.G., Bourdenx, M., Storm, N.J., Cochran, J.N., Sirkis, D.W., Hwang, J.H., Bonham, L.W.,  
501 Ramos, E.M., Diaz, A., Van Berlo, V., et al. (2019). Rare variants in the neuronal ceroid  
502 lipofuscinosis gene MFSD8 are candidate risk factors for frontotemporal dementia. *Acta*  
503 *Neuropathol.* 137, 71–88.
- 504 10. Pottier, C., Ren, Y., Perkerson, R.B., 3rd, Baker, M., Jenkins, G.D., van Blitterswijk, M., DeJesus-  
505 Hernandez, M., van Rooij, J.G.J., Murray, M.E., Christopher, E., et al. (2019). Genome-wide

- 506 analyses as part of the international FTLD-TDP whole-genome sequencing consortium reveals  
507 novel disease risk factors and increases support for immune dysfunction in FTLD. *Acta*  
508 *Neuropathol.*
- 509 11. Karch, C.M., Wen, N., Fan, C.C., Yokoyama, J.S., Kouri, N., Ross, O.A., Hoglinger, G., Muller, U.,  
510 Ferrari, R., Hardy, J., et al. (2018). Selective Genetic Overlap Between Amyotrophic Lateral  
511 Sclerosis and Diseases of the Frontotemporal Dementia Spectrum. *JAMA Neurol.* 75, 860–875.
- 512 12. Ferrari, R., Wang, Y., Vandrovicova, J., Guelfi, S., Witeolar, A., Karch, C.M., Schork, A.J., Fan, C.C.,  
513 Brewer, J.B., International, F.T.D.G.C., et al. (2017). Genetic architecture of sporadic  
514 frontotemporal dementia and overlap with Alzheimer's and Parkinson's diseases. *J. Neurol.*  
515 *Neurosurg. Psychiatry* 88, 152–164.
- 516 13. Broce, I., Karch, C.M., Wen, N., Fan, C.C., Wang, Y., Tan, C.H., Kouri, N., Ross, O.A., Hoglinger, G.U.,  
517 Muller, U., et al. (2018). Immune-related genetic enrichment in frontotemporal dementia: An  
518 analysis of genome-wide association studies. *PLoS Med.* 15, e1002487.
- 519 14. Yokoyama, J.S., Wang, Y., Schork, A.J., Thompson, W.K., Karch, C.M., Cruchaga, C., McEvoy, L.K.,  
520 Witoelar, A., Chen, C.H., Holland, D., et al. (2016). Association Between Genetic Traits for Immune-  
521 Mediated Diseases and Alzheimer Disease. *JAMA Neurol.* 73, 691–697.
- 522 15. Desikan, R.S., Schork, A.J., Wang, Y., Witoelar, A., Sharma, M., McEvoy, L.K., Holland, D., Brewer,  
523 J.B., Chen, C.H., Thompson, W.K., et al. (2015). Genetic overlap between Alzheimer's disease and  
524 Parkinson's disease at the MAPT locus. *Mol. Psychiatry* 20, 1588–1595.
- 525 16. Cochran, J.N., McKinley, E.C., Cochran, M., Amaral, M.D., Moyers, B.A., Lasseigne, B.N., Gray, D.E.,  
526 Lawlor, J.M.J., Prokop, J.W., Geier, E.G., et al. (2019). Genome sequencing for early-onset  
527 dementia: high diagnostic yield and frequent observation of multiple contributory alleles. *bioRxiv*,  
528 748046.
- 529 17. Bowling, K.M., Thompson, M.L., Amaral, M.D., Finnila, C.R., Hiatt, S.M., Engel, K.L., Cochran, J.N.,  
530 Brothers, K.B., East, K.M., Gray, D.E., et al. (2017). Genomic diagnosis for children with intellectual  
531 disability and/or developmental delay. *Genome Med.* 9, 43.
- 532 18. Li, H., and Durbin, R. (2009). Fast and accurate short read alignment with Burrows–Wheeler transform.  
533 *Bioinformatics* 25, 1754–1760.

- 534 19. Tarasov, A., Vilella, A.J., Cuppen, E., Nijman, I.J., and Prins, P. (2015). Sambamba: fast processing of  
535 NGS alignment formats. *Bioinformatics* 31, 2032–2034.
- 536 20. McKenna, A., Hanna, M., Banks, E., Sivachenko, A., Cibulskis, K., Kernytsky, A., Garimella, K.,  
537 Altshuler, D., Gabriel, S., and Daly, M. (2010). The Genome Analysis Toolkit: a MapReduce  
538 framework for analyzing next-generation DNA sequencing data. *Genome res.* 20, 1297–1303.
- 539 21. Danecek, P., Auton, A., Abecasis, G., Albers, C.A., Banks, E., DePristo, M.A., Handsaker, R.E., Lunter,  
540 G., Marth, G.T., Sherry, S.T., et al. (2011). The variant call format and VCFtools. *Bioinformatics* 27,  
541 2156-2158.
- 542 22. Li, H. (2011). A statistical framework for SNP calling, mutation discovery, association mapping and  
543 population genetical parameter estimation from sequencing data. *Bioinformatics* 27, 2987–2993.
- 544 23. Paila, U., Chapman, B.A., Kirchner, R., and Quinlan, A.R. (2013). GEMINI: integrative exploration of  
545 genetic variation and genome annotations. *PLoS Comput. Biol.* 9, e1003153.
- 546 24. Pedersen, B.S., Collins, R.L., Talkowski, M.E., and Quinlan, A.R. (2017). Indexcov: fast coverage  
547 quality control for whole-genome sequencing. *GigaScience*.
- 548 25. Manichaikul, A., Mychaleckyj, J.C., Rich, S.S., Daly, K., Sale, M., and Chen, W.M. (2010). Robust  
549 relationship inference in genome-wide association studies. *Bioinformatics* 26, 2867–2873.
- 550 26. Purcell, S., Neale, B., Todd-Brown, K., Thomas, L., Ferreira, M.A., Bender, D., Maller, J., Sklar, P., de  
551 Bakker, P.I., Daly, M.J., et al. (2007). PLINK: a tool set for whole-genome association and  
552 population-based linkage analyses. *Am. J. Hum. Genet.* 81, 559–575.
- 553 27. Genomes Project, C., Auton, A., Brooks, L.D., Durbin, R.M., Garrison, E.P., Kang, H.M., Korbel, J.O.,  
554 Marchini, J.L., McCarthy, S., McVean, G.A., et al. (2015). A global reference for human genetic  
555 variation. *Nature* 526, 68–74.
- 556 28. Alexander, D.H., Novembre, J., and Lange, K. (2009). Fast model-based estimation of ancestry in  
557 unrelated individuals. *Genome Res.* 19, 1655–1664.
- 558 29. Tan, A., Abecasis, G.R., and Kang, H.M. (2015). Unified representation of genetic variants.  
559 *Bioinformatics* 31, 2202–2204.

- 560 30. Kircher, M., Witten, D.M., Jain, P., O'Roak, B.J., Cooper, G.M., and Shendure, J. (2014). A general  
561 framework for estimating the relative pathogenicity of human genetic variants. *Nat. Genet.* 46, 310–  
562 315.
- 563 31. Cingolani, P., Platts, A., Wang, L.L., Coon, M., Nguyen, T., Wang, L., Land, S.J., Lu, X., and Ruden,  
564 D.M. (2012). A program for annotating and predicting the effects of single nucleotide  
565 polymorphisms, SnpEff: SNPs in the genome of *Drosophila melanogaster* strain w1118; iso-2; iso-  
566 3. *Fly* 6, 80–92.
- 567 32. NHLBI, U.o.M.a. (2018). The NHLBI Trans-Omics for Precision Medicine (TOPMed) Whole Genome  
568 Sequencing Program. BRAVO variant browser. In. (
- 569 33. Zhao, H., Sun, Z., Wang, J., Huang, H., Kocher, J.-P., and Wang, L. (2013). CrossMap: a versatile tool  
570 for coordinate conversion between genome assemblies. *Bioinformatics* 30, 1006–1007.
- 571 34. Liu, X., White, S., Peng, B., Johnson, A.D., Brody, J.A., Li, A.H., Huang, Z., Carroll, A., Wei, P., Gibbs,  
572 R., et al. (2016). WGS: an annotation pipeline for human genome sequencing studies. *J. Med.*  
573 *Genet.* 53, 111–112.
- 574 35. Lek, M., Karczewski, K.J., Minikel, E.V., Samocha, K.E., Banks, E., Fennell, T., O'Donnell-Luria, A.H.,  
575 Ware, J.S., Hill, A.J., Cummings, B.B., et al. (2016). Analysis of protein-coding genetic variation in  
576 60,706 humans. *Nature* 536, 285–291.
- 577 36. Karczewski, K.J., Francioli, L.C., Tiao, G., Cummings, B.B., Alföldi, J., Wang, Q., Collins, R.L.,  
578 Laricchia, K.M., Ganna, A., Birnbaum, D.P., et al. (2019). Variation across 141,456 human exomes  
579 and genomes reveals the spectrum of loss-of-function intolerance across human protein-coding  
580 genes. *bioRxiv*, 531210.
- 581 37. Sherry, S.T., Ward, M.H., Kholodov, M., Baker, J., Phan, L., Smigielski, E.M., and Sirotkin, K. (2001).  
582 dbSNP: the NCBI database of genetic variation. *Nucleic Acids Res.* 29, 308–311.
- 583 38. Lu, Q., Powles, R.L., Abdallah, S., Ou, D., Wang, Q., Hu, Y., Lu, Y., Liu, W., Li, B., Mukherjee, S., et al.  
584 (2017). Systematic tissue-specific functional annotation of the human genome highlights immune-  
585 related DNA elements for late-onset Alzheimer's disease. *PLoS Genet.* 13, e1006933.
- 586 39. Wu, M.C., Lee, S., Cai, T., Li, Y., Boehnke, M., and Lin, X. (2011). Rare-variant association testing for  
587 sequencing data with the sequence kernel association test. *Am. J. Hum. Genet.* 89, 82–93.

- 588 40. Weiner, M.W., Veitch, D.P., Aisen, P.S., Beckett, L.A., Cairns, N.J., Cedarbaum, J., Green, R.C.,  
589 Harvey, D., Jack, C.R., Jagust, W., et al. (2015). 2014 Update of the Alzheimer's Disease  
590 Neuroimaging Initiative: A review of papers published since its inception. *Alzheimers Dement.* 11,  
591 e1–120.
- 592 41. Saykin, A.J., Shen, L., Foroud, T.M., Potkin, S.G., Swaminathan, S., Kim, S., Risacher, S.L., Nho, K.,  
593 Huentelman, M.J., Craig, D.W., et al. (2010). Alzheimer's Disease Neuroimaging Initiative  
594 biomarkers as quantitative phenotypes: Genetics core aims, progress, and plans. *Alzheimers*  
595 *Dement.* 6, 265–273.
- 596 42. Petersen, R.C., Aisen, P.S., Beckett, L.A., Donohue, M.C., Gamst, A.C., Harvey, D.J., Jack, C.R., Jr.,  
597 Jagust, W.J., Shaw, L.M., Toga, A.W., et al. (2010). Alzheimer's Disease Neuroimaging Initiative  
598 (ADNI): clinical characterization. *Neurology* 74, 201–209.
- 599 43. Morris, J.C. (1993). The Clinical Dementia Rating (CDR): current version and scoring rules. *Neurology*  
600 43, 2412–2414.
- 601 44. Williams, M.M., Storandt, M., Roe, C.M., and Morris, J.C. (2013). Progression of Alzheimer's disease  
602 as measured by Clinical Dementia Rating Sum of Boxes scores. *Alzheimers Dement.* 9, S39–44.
- 603 45. O'Bryant, S.E., Lacritz, L.H., Hall, J., Waring, S.C., Chan, W., Khodr, Z.G., Massman, P.J., Hobson, V.,  
604 and Cullum, C.M. (2010). Validation of the new interpretive guidelines for the clinical dementia  
605 rating scale sum of boxes score in the national Alzheimer's coordinating center database. *Arch.*  
606 *Neurol.* 67, 746–749.
- 607 46. Lattante, S., Ciura, S., Rouleau, G.A., and Kabashi, E. (2015). Defining the genetic connection linking  
608 amyotrophic lateral sclerosis (ALS) with frontotemporal dementia (FTD). *Trends Genet.* 31, 263–  
609 273.
- 610 47. Consortium, P.M.A.L.S.S. (2018). Project MinE: study design and pilot analyses of a large-scale whole-  
611 genome sequencing study in amyotrophic lateral sclerosis. *Eur. J. Hum. Genet.* 26, 1537–1546.
- 612 48. Bis, J.C., Jian, X., Kunkle, B.W., Chen, Y., Hamilton-Nelson, K.L., Bush, W.S., Salerno, W.J., Lancour,  
613 D., Ma, Y., Renton, A.E., et al. (2018). Whole exome sequencing study identifies novel rare and  
614 common Alzheimer's-Associated variants involved in immune response and transcriptional  
615 regulation. *Mol. Psychiatry.*

- 616 49. Folstein, M.F., Folstein, S.E., and McHugh, P.R. (1975). "Mini-mental state". A practical method for  
617 grading the cognitive state of patients for the clinician. *J. Psychiatr. Res.* 12, 189–198.
- 618 50. Horvath, S., and Raj, K. (2018). DNA methylation-based biomarkers and the epigenetic clock theory of  
619 ageing. *Nat. Rev. Genet.* 19, 371–384.
- 620 51. Heyward, F.D., and Sweatt, J.D. (2015). DNA Methylation in Memory Formation: Emerging Insights.  
621 *Neuroscientist* 21, 475–489.
- 622 52. Antunes, C., Sousa, N., Pinto, L., and Marques, C.J. (2019). TET enzymes in neurophysiology and  
623 brain function. *Neurosci. Biobehav. Rev.*
- 624 53. Fransquet, P.D., Wrigglesworth, J., Woods, R.L., Ernst, M.E., and Ryan, J. (2019). The epigenetic  
625 clock as a predictor of disease and mortality risk: a systematic review and meta-analysis. *Clin.*  
626 *Epigenetics* 11, 62.
- 627 54. Jessop, P., and Toledo-Rodriguez, M. (2018). Hippocampal TET1 and TET2 Expression and DNA  
628 Hydroxymethylation Are Affected by Physical Exercise in Aged Mice. *Front. Cell Dev. Biol.* 6, 45.
- 629 55. Gontier, G., Iyer, M., Shea, J.M., Bieri, G., Wheatley, E.G., Ramalho-Santos, M., and Villeda, S.A.  
630 (2018). Tet2 Rescues Age-Related Regenerative Decline and Enhances Cognitive Function in the  
631 Adult Mouse Brain. *Cell Rep.* 22, 1974–1981.
- 632 56. Li, X., Yao, B., Chen, L., Kang, Y., Li, Y., Cheng, Y., Li, L., Lin, L., Wang, Z., Wang, M., et al. (2017).  
633 Ten-eleven translocation 2 interacts with forkhead box O3 and regulates adult neurogenesis. *Nat.*  
634 *Commun.* 8, 15903.
- 635 57. Mi, Y., Gao, X., Dai, J., Ma, Y., Xu, L., and Jin, W. (2015). A Novel Function of TET2 in CNS:  
636 Sustaining Neuronal Survival. *Int. J. Mol. Sci.* 16, 21846–21857.
- 637 58. Beck, D.B., Petracovici, A., He, C., Moore, H.W., Louie, R.J., Ansar, M., Douzgou, S., Sithambaram, S.,  
638 Cottrell, T., Santos-Cortez, R.L.P., et al. (2019). Delineation of the First Human Mendelian Disorder  
639 of the DNA Demethylation Machinery: *TET3* Deficiency. *bioRxiv*, 719047.
- 640 59. Carrillo-Jimenez, A., Deniz, Ö., Niklison-Chirou, M.V., Ruiz, R., Bezerra-Salomão, K., Stratoulis, V.,  
641 Amouroux, R., Yip, P.K., Vilalta, A., Cheray, M., et al. (2019). TET2 regulates the  
642 neuroinflammatory response in microglia. *bioRxiv*, 592055.



- 643 60. Ewers, M., Franzmeier, N., Suarez-Calvet, M., Morenas-Rodriguez, E., Caballero, M.A.A., Kleinberger,  
644 G., Piccio, L., Cruchaga, C., Deming, Y., Dichgans, M., et al. (2019). Increased soluble TREM2 in  
645 cerebrospinal fluid is associated with reduced cognitive and clinical decline in Alzheimer's disease.  
646 *Sci. Transl. Med.* 11.
- 647 61. Pottier, C., Wallon, D., Rousseau, S., Rovelet-Lecrux, A., Richard, A.C., Rollin-Sillaire, A., Frebourg, T.,  
648 Champion, D., and Hannequin, D. (2013). TREM2 R47H variant as a risk factor for early-onset  
649 Alzheimer's disease. *J. Alzheimers Dis.* 35, 45–49.
- 650 62. Cuyvers, E., Bettens, K., Philtjens, S., Van Langenhove, T., Gijselincx, I., van der Zee, J., Engelborghs,  
651 S., Vandenbulcke, M., Van Dongen, J., Geerts, N., et al. (2014). Investigating the role of rare  
652 heterozygous TREM2 variants in Alzheimer's disease and frontotemporal dementia. *Neurobiol.*  
653 *Aging* 35, 726 e711–729.
- 654 63. Nguyen, H.P., Van Broeckhoven, C., and van der Zee, J. (2018). ALS Genes in the Genomic Era and  
655 their Implications for FTD. *Trends Genet.* 34, 404–423.
- 656 64. Orme, T., Guerreiro, R., and Bras, J. (2018). The Genetics of Dementia with Lewy Bodies: Current  
657 Understanding and Future Directions. *Curr. Neurol. Neurosci. Rep.* 18, 67.
- 658 65. van Blitterswijk, M., Mullen, B., Wojtas, A., Heckman, M.G., Diehl, N.N., Baker, M.C., DeJesus-  
659 Hernandez, M., Brown, P.H., Murray, M.E., Hsiung, G.Y., et al. (2014). Genetic modifiers in carriers  
660 of repeat expansions in the C9ORF72 gene. *Mol. Neurodegener.* 9, 38.
- 661 66. Hutton, M., Lendon, C.L., Rizzu, P., Baker, M., Froelich, S., Houlden, H., Pickering-Brown, S.,  
662 Chakraverty, S., Isaacs, A., Grover, A., et al. (1998). Association of missense and 5'-splice-site  
663 mutations in tau with the inherited dementia FTDP-17. *Nature* 393, 702–705.
- 664 67. Cruts, M., Theuns, J., and Van Broeckhoven, C. (2012). Locus-specific mutation databases for  
665 neurodegenerative brain diseases. *Hum. Mutat.* 33, 1340–1344.
- 666 68. Rademakers, R., Dermaut, B., Peeters, K., Cruts, M., Heutink, P., Goate, A., and Van Broeckhoven, C.  
667 (2003). Tau (MAPT) mutation Arg406Trp presenting clinically with Alzheimer disease does not  
668 share a common founder in Western Europe. *Hum. Mutat.* 22, 409–411.

- 669 69. Reed, L.A., Grabowski, T.J., Schmidt, M.L., Morris, J.C., Goate, A., Solodkin, A., Van Hoesen, G.W.,  
670 Schelper, R.L., Talbot, C.J., Wragg, M.A., et al. (1997). Autosomal dominant dementia with  
671 widespread neurofibrillary tangles. *Ann. Neurol.* 42, 564–572.
- 672 70. Kwok, J.B., Teber, E.T., Loy, C., Hallupp, M., Nicholson, G., Mellick, G.D., Buchanan, D.D., Silburn,  
673 P.A., and Schofield, P.R. (2004). Tau haplotypes regulate transcription and are associated with  
674 Parkinson's disease. *Ann. Neurol.* 55, 329–334.
- 675 71. van der Spek, R.A.A., van Rheenen, W., Pulit, S.L., Kenna, K.P., van den Berg, L.H., Veldink, J.H., and  
676 Project Min, E.A.L.S.S.C.p.s. (2019). The project MinE databrowser: bringing large-scale whole-  
677 genome sequencing in ALS to researchers and the public. *Amyotroph. Lateral. Scler.*  
678 *Frontotemporal Degener.* 20, 432–440.
- 679 72. Bennett, D.A., Buchman, A.S., Boyle, P.A., Barnes, L.L., Wilson, R.S., and Schneider, J.A. (2018).  
680 Religious Orders Study and Rush Memory and Aging Project. *J. Alzheimers Dis.* 64, S161–S189.
- 681 73. Allen, M., Carrasquillo, M.M., Funk, C., Heavner, B.D., Zou, F., Younkin, C.S., Burgess, J.D., Chai,  
682 H.S., Crook, J., Eddy, J.A., et al. (2016). Human whole genome genotype and transcriptome data  
683 for Alzheimer's and other neurodegenerative diseases. *Sci. Data* 3, 160089.  
684  
685

686 FIGURES

687

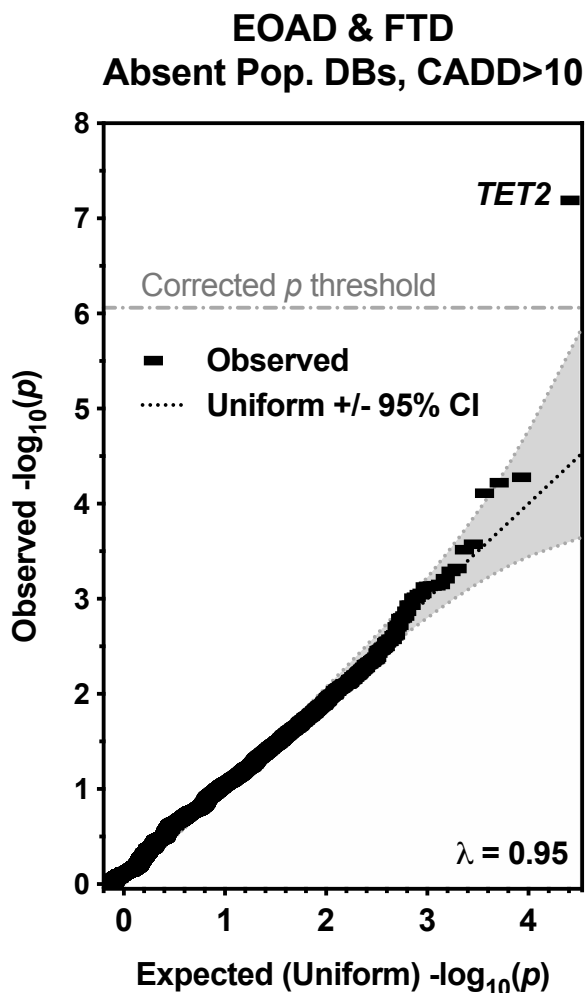

688

689

690 **Figure 1: QQ plot of  $p$ -values from the discovery burden analysis of EOAD and FTD cases versus**  
691 **controls and Private, CADD > 10 Variants. *TET2* is the top and only hit reaching statistical significance**  
692 **(corrected  $p < 0.05$ ). No genomic inflation was observed ( $\lambda = 0.95$ ). The uniform distribution and theoretical**  
693 **95% confidence interval based on a beta distribution is shown. Note that, in addition to passing the**  
694 **correction threshold, *TET2* also falls well outside of theoretical random  $p$ -value distributions.**

695

696

## A Coding & Non-Coding Variation is Similarly Enriched in *TET2*

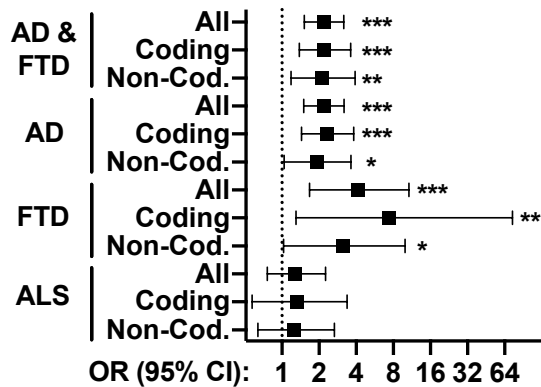

## B Non-Coding Variants Near the *TET2* TSS

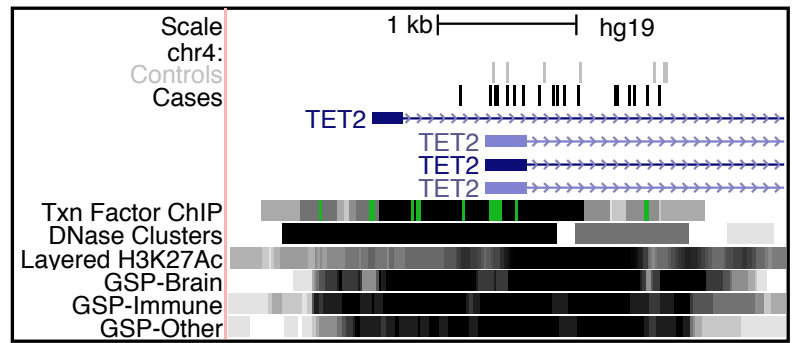

697

698

699 **Figure 2: Qualifying non-coding variation in *TET2* is enriched at a similar level as coding variation**

700 **and occurs in key predicted functional regulatory regions. A.** Odds ratios are shown for combined

701 analyses (cohorts described in **Table 1**). Breaking out coding and non-coding variation reveals similar

702 effect sizes and *p*-values. \* indicates  $p < 0.05$ , \*\* indicates  $p < 0.01$ , and \*\*\* indicates  $p < 0.001$  by Fisher's

703 exact test. **B.** Non-coding variants near the *TET2* transcription start site (hg19 chr4:106,066,000-

704 106,070,000) serve as an example of variant enrichment in key regions predicted to have regulatory

705 function. GSP indicates GenoSkyline-Plus regions.

706

707

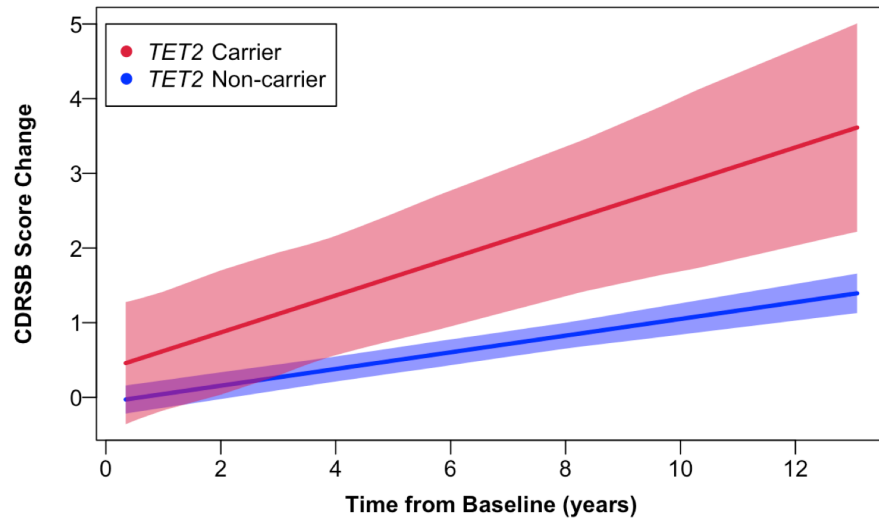

708

709

710 **Figure 3: Longitudinal CDRSB changes in ADNI participants with qualifying *TET2* rare variants.**

711 *TET2* rare variant carriers show greater CDRSB changes over time compared to non-carriers after

712 controlling for age, sex, education, *APOE*  $\epsilon 4$ , and baseline CDRSB score ( $\beta \pm SE = 0.14 \pm 0.06$ ;  $*p=0.03$ ).

713 The lines depicted illustrate CDRSB change with 95% confidence intervals in shading. ADNI – Alzheimer's

714 Disease Neuroimaging Initiative; CDRSB – Clinical Dementia Rating Sum of Boxes Score.

## TABLES

| Cohort Type | Cohort                      | Cases w/ | Cases w/o | Ctrls w/ | Ctrls w/o | SKAT $p$                               | Corr. $p$                               | FET $p$              | OR (95% CI)     |
|-------------|-----------------------------|----------|-----------|----------|-----------|----------------------------------------|-----------------------------------------|----------------------|-----------------|
| Discovery   | UCSF Eur. (EOAD & FTD)      | 19       | 474       | 1        | 670       | <b><math>6.5 \times 10^{-8}</math></b> | <b><math>3.7 \times 10^{-3*}</math></b> | $8.1 \times 10^{-7}$ | 26.8 (4.2–1112) |
| Replication | UCSF Non-Eur. (EOAD & FTD)  | 7        | 138       | 1        | 156       | 0.840                                  | NA                                      | 0.031                | 7.9 (1.0–358)   |
| Replication | ADSP Genomes (LOAD)         | 64       | 2,144     | 36       | 2,172     | $4.6 \times 10^{-4}$                   | NA                                      | $6.0 \times 10^{-3}$ | 1.8 (1.2–2.8)   |
| Replication | AMP-AD (LOAD & FTD)         | 15       | 918       | 7        | 439       | 0.907                                  | NA                                      | 1.000                | 1.0 (0.4–3.0)   |
| Replication | All Replication Cohorts     | 86       | 3,200     | 44       | 2,767     | $7.1 \times 10^{-3}$                   | $7.1 \times 10^{-3*}$                   | $4.4 \times 10^{-3}$ | 1.7 (1.2–2.5)   |
| Combined    | Discovery + All Replication | 105      | 3,674     | 45       | 3,437     | $8.0 \times 10^{-6}$                   | NA                                      | $7.0 \times 10^{-6}$ | 2.2 (1.5–3.2)   |

**Table 1: Discovery and replication for private, CADD > 10 coding and non-coding variants in *TET2* (combined analysis of all cases, AD and FTD, vs. controls).** Variants in *TET2* absent from population databases and with a CADD score > 10 (including non-coding variants in GenoSkyline-Plus regions) in the combined analysis considering both EOAD and FTD cases vs. controls was the only qualifying gene and filter set in the discovery analysis to reach statistical significance. While we applied a correction factor of 57,354 based on genome wide (19,118 HGNC protein-coding genes) testing of three clusters of correlated filter conditions (**Supplemental Figure 2**), *TET2* remains significant if we conservatively do not consider the correlated nature of the different filter sets and instead apply a strict Bonferroni correction ( $p = 0.033$ ). The primary test was SKAT corrected for number of *APOE*  $\epsilon 4$  alleles, sex, principal components 1–4, and 5 ADMIXTURE ancestral proportions. Fisher’s exact test yielded similar raw  $p$  values and was highly correlated with SKAT (Pearson’s  $r=0.76$  of log-transformed  $p$  values) and is presented here for consistency with **Table 2**, where some cohorts did not have covariate data available for SKAT and therefore relied on Fisher’s exact. The main analyses based on pre-determined criteria are bolded and \* indicates significance ( $p < 0.05$  after correction). NA = Not Applicable. Replication cohorts are listed individually for reference as well as combined discovery plus replication statistics. Subsets of AD only vs. control and FTD only vs. control are provided in **Supplemental Table 4** and **Supplemental Table 5**, respectively.

| Cohort Type       | Cohort                          | Cases w/          | Cases w/o | Ctrls w/             | Ctrls w/o | SKAT $p$                     | FET $p$               | OR (95% CI)             | Cases Freq. | Ctrls Freq. |
|-------------------|---------------------------------|-------------------|-----------|----------------------|-----------|------------------------------|-----------------------|-------------------------|-------------|-------------|
| Discovery         | UCSF Eur. (EOAD & FTD)          | 7                 | 486       | 0                    | 671       | $4.0 \times 10^{-3}$         | $2.4 \times 10^{-3}$  | $\infty$ (2– $\infty$ ) | 1.42%       | 0.00%       |
| Replication       | UCSF Non-Eur. (EOAD & FTD)      | 1                 | 144       | 1                    | 156       | 0.058                        | 1.000                 | 1.1 (0.0–85.5)          | 0.69%       | 0.64%       |
| Replication       | ADSP Genomes (LOAD)             | 31                | 2,177     | 12                   | 2,196     | $3.7 \times 10^{-4}$         | $5.2 \times 10^{-3}$  | 2.6 (1.3–5.6)           | 1.40%       | 0.54%       |
| Replication       | AMP-AD (LOAD & FTD)             | 0                 | 933       | 1                    | 445       | 0.215                        | 0.323                 | 0.0 (0.0–18.6)          | 0.00%       | 0.22%       |
| Replication       | Project MinE (ALS)              | 21                | 4,345     | 5                    | 1,827     | NA                           | 0.289                 | 1.8 (0.6–6)             | 0.48%       | 0.27%       |
| Replication       | HA-Duke-Stanford (ALS)          | 11                | 2,863     | 5                    | 6,400     | NA                           | $2.0 \times 10^{-3}$  | 4.9 (1.6–18.1)          | 0.38%       | 0.08%       |
| Replication       | All Rep. Cohorts (AD, FTD, ALS) | 64                | 10,462    | 24                   | 11,024    | NA                           | $8.1 \times 10^{-6}$  | 2.8 (1.7–4.7)           | 0.61%       | 0.22%       |
| Combined          | Discovery + Replication         | 71                | 10,948    | 24                   | 11,695    | NA                           | $2.5 \times 10^{-7*}$ | 3.2 (2.0–5.3)           | 0.64%       | 0.20%       |
| Combined Subset   | AD except ADSP Exomes           | 35                | 3,216     | 14                   | 3,468     | $2.7 \times 10^{-3}$         | $1.4 \times 10^{-3}$  | 2.7 (1.4–5.4)           | 1.08%       | 0.40%       |
| Summary Stat. Set | ADSP Exomes (summary stats)     | 6,345 total cases |           | 4,893 total controls |           | 0.019 (ADSP model $p$ value) |                       |                         | CMAF 0.49%  |             |
| Combined Subset   | All FTD                         | 4                 | 524       | 2                    | 1,272     | 0.921                        | 0.065                 | 4.9 (0.7–53.7)          | 0.76%       | 0.16%       |
| Combined Subset   | All ALS                         | 32                | 7,208     | 10                   | 8,227     | NA                           | $1.4 \times 10^{-4}$  | 3.7 (1.8–8.3)           | 0.44%       | 0.12%       |
| Combined Subset   | All FTD & ALS                   | 36                | 7,732     | 12                   | 9,499     | NA                           | $3.0 \times 10^{-5}$  | 3.7 (1.9–7.8)           | 0.46%       | 0.13%       |
| Population DBs    | gnomAD+TOPMed                   | –                 | –         | 284                  | 196,035   | –                            | –                     | –                       | –           | 0.14%       |

**Table 2: Canonical loss-of-function variation in *TET2* is nominally enriched in both AD and FTD-ALS.** Because of the high number of canonical loss-of-function variants in *TET2* observed in the discovery analysis, we performed a separate assessment of loss-of-function variants alone. Although the loss-of-function model did not pass multiple testing correction in the discovery analysis because of the low number of qualifying counts, *TET2* was the highest ranked loss-of-function gene (lowest  $p$ -value for enrichment in cases). Note the additional inclusion of ALS exomes (HA-Duke-Stanford). \* indicates that the combined analysis across all cases and controls (in bold) was below an arbitrary exome-wide cutoff of  $2.5 \times 10^{-6}$  (a commonly used threshold based on correction of  $p < 0.05$  for  $\sim 20,000$  genes). SKAT values could not be calculated for ALS sets (and thus not for summed replication and discovery+replication sets) because necessary covariate data were not available for these cohorts, although both ALS cohorts were independently filtered to only individuals of European ancestry. Below this combined analysis, we also present summaries by each disease, which achieved nominal significance ( $p < 0.05$ ) for both combined analysis of all AD cases and of all FTD and ALS cases. Note the addition of summary statistics from ADSP exomes in this section as well. For ADSP exomes, the  $p$ -value from the VEP HIGH meta-analysis model is shown (publicly available from NIAGADS). For comparison, we have also listed the frequency of *TET2* loss-of-function carriers in

population databases (gnomAD minus TOPMed set added to counts from TOPMed), which is similar to the frequencies observed in control groups we analyzed. All frequencies are the percentage of individuals harboring a loss-of-function variant (not minor allele frequency) except ADSP exomes for which cumulative minor allele frequency (CMAF) for both cases and controls is listed.



## SUPPLEMENTAL DATA

## SUPPLEMENTAL FIGURES

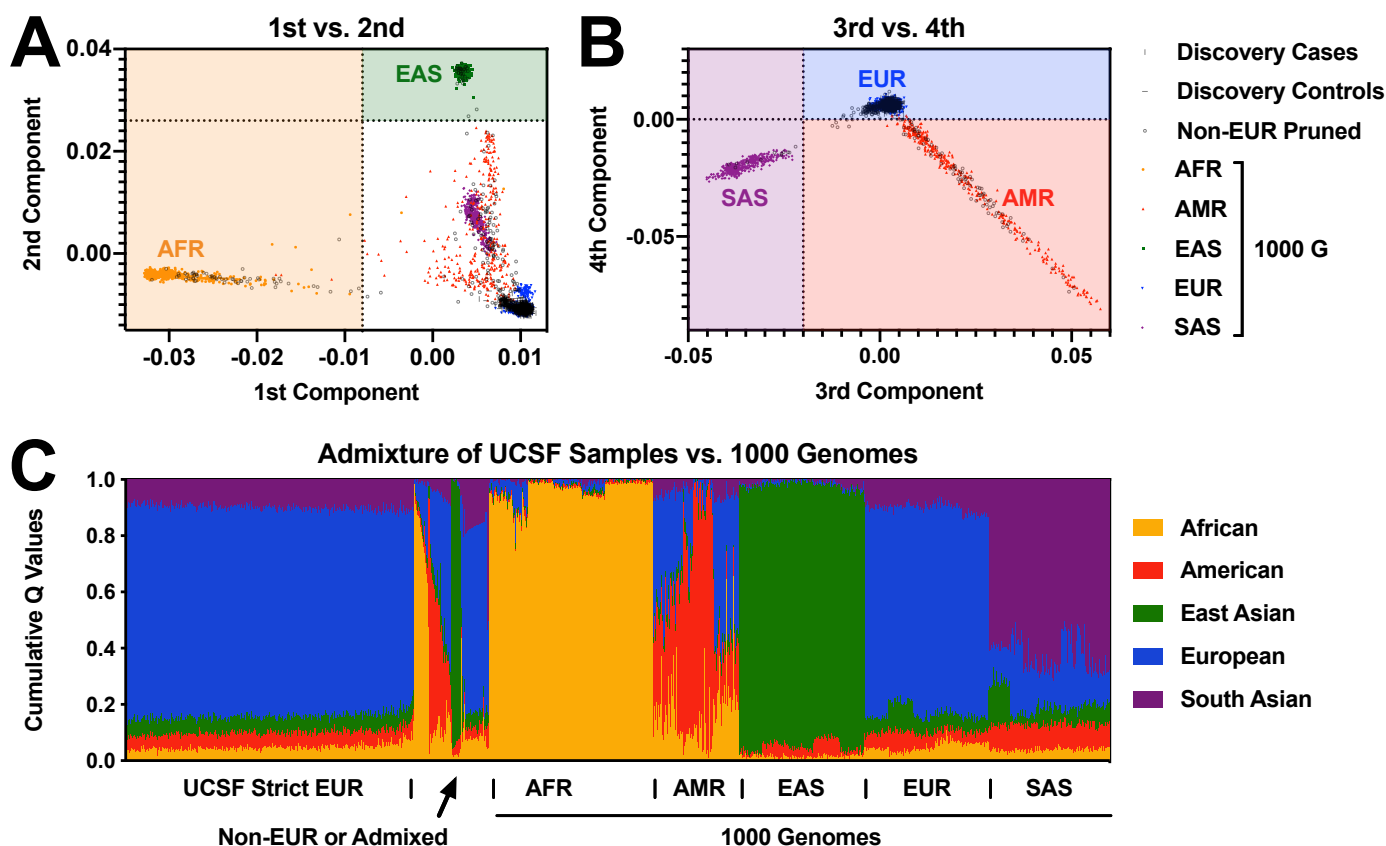

**Supplemental Figure 1: Ancestry analysis.** Principal component analysis (PCA) of common variants was used to separate superpopulations by comparing clusters to 1000 genomes data for **A**. PC1 (separates AFR ancestry) and PC2 (separates EAS ancestry), and **B**. PC3 (separates SAS ancestry) and PC4 (separates AMR ancestry). **C**. The remaining samples were considered as candidates for EUR ancestry but were further pruned to disallow any ancestral proportion of greater than 15% by ADMIXTURE with  $k=5$  from the 4 ancestral populations least enriched in EUR samples, again comparing to 1000 genomes data. The remaining samples are in the “UCSF Strict EUR” bin. Cases and controls are plotted as vertical and horizontal lines and cluster above the 1000 genomes control data in **B** and **C**, with samples pruned for non-EUR ancestry shown as circles.

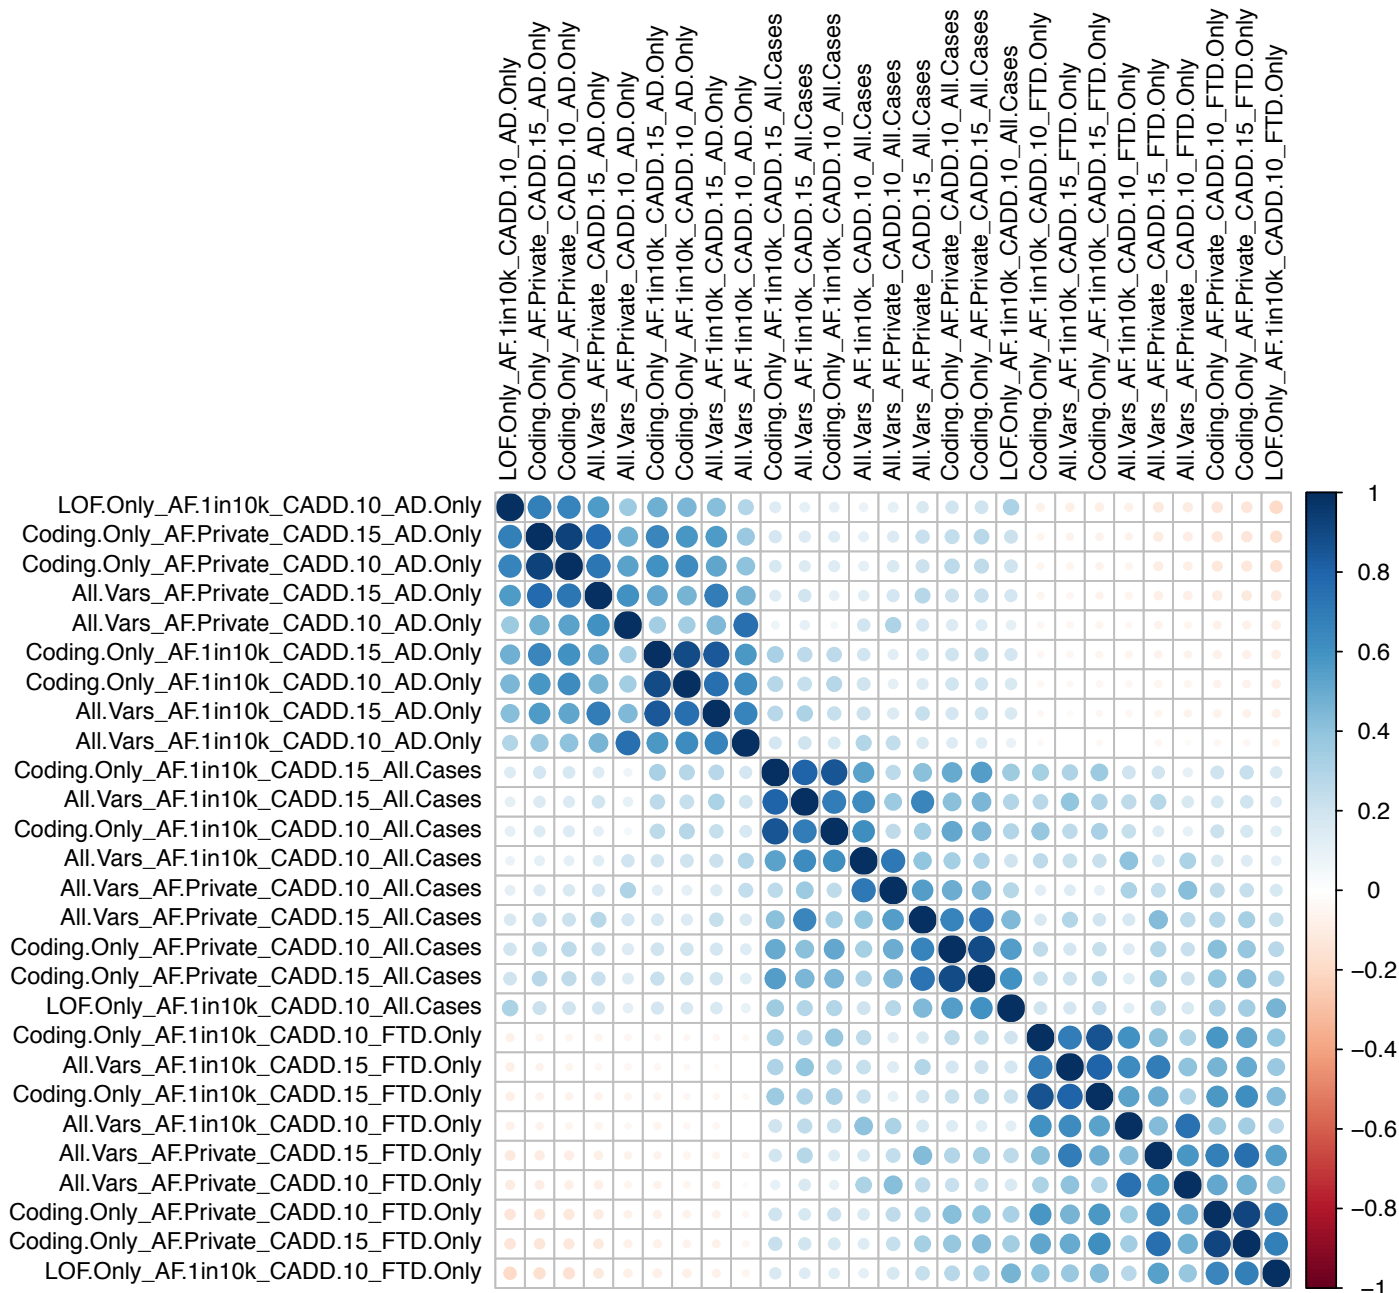

**Supplemental Figure 2: Cross-correlation plot of tested filter conditions.** Pearson correlations were calculated for log transformed  $p$  values between all filter sets tested. Filter sets were positively correlated with one another within three main clusters emerging corresponding to case-control comparison groups.

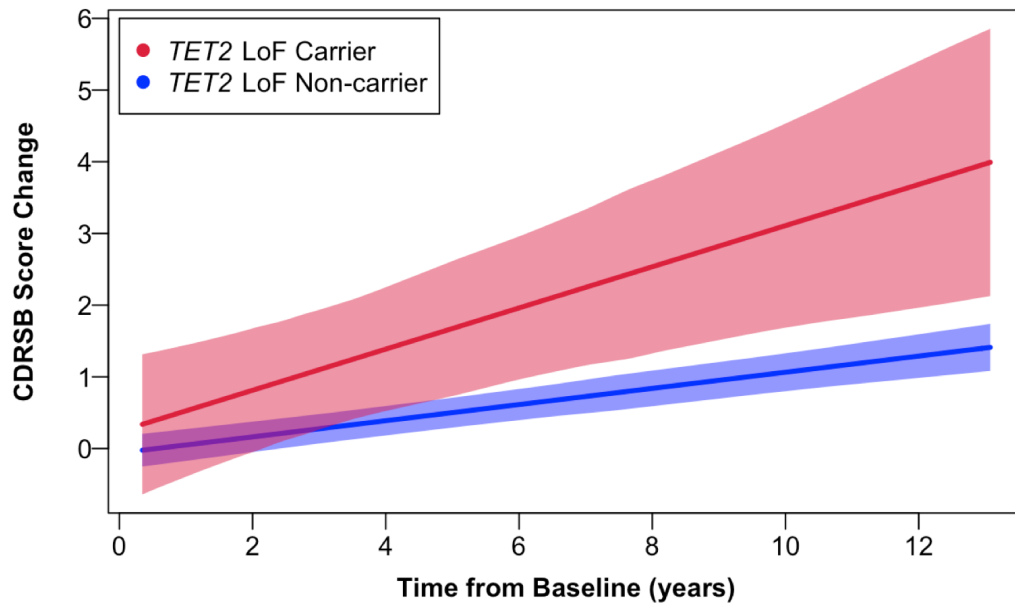

**Supplemental Figure 3: Longitudinal CDRSB changes in ADNI participants with *TET2* loss-of-function variants.** *TET2* rare variant carriers whose changes are predicted to result in a loss-of-function variant show greater CDRSB changes over time compared to non-carriers after controlling for age, sex, education, *APOE*  $\epsilon 4$ , and baseline CDRSB score ( $\beta \pm SE = 0.17 \pm 0.09$ ;  $*p=0.04$ ). The lines depicted illustrate CDRSB change with 95% confidence intervals in shading. ADNI – Alzheimer’s Disease Neuroimaging Initiative; CDRSB – Clinical Dementia Rating Sum of Boxes Score.

## SUPPLEMENTAL TABLES

**Supplemental Table 1:** GenoSkyline-Plus tracks. Only tracks from tissue were included. See Excel file.

**Supplemental Table 2:** Demographic information. See Excel file.

**Supplemental Table 3:** List of all 19,118 hg19 HUGO Gene Nomenclature Committee (HGNC) genes tested. See Excel file.

| Cohort Type          | Cohort                      | Cases w/ | Cases w/o | Ctrls w/ | Ctrls w/o | SKAT <i>p</i>        | FET <i>p</i>         | Bonf. <i>p</i> | OR (95% CI)     |
|----------------------|-----------------------------|----------|-----------|----------|-----------|----------------------|----------------------|----------------|-----------------|
| Discovery (EOAD)     | UCSF Eur. (EOAD)            | 11       | 217       | 1        | 670       | 8.1x10 <sup>-4</sup> | 2.2x10 <sup>-6</sup> | 0.071          | 33.8 (4.9–1453) |
| Replication (EOAD)   | UCSF Non-Eur. (EOAD)        | 4        | 62        | 1        | 156       | 0.778                | 0.028                | NA             | 10.0 (1.0–497)  |
| Replication (LOAD)   | ADSP Genomes (LOAD)         | 64       | 2,144     | 36       | 2,172     | 4.6x10 <sup>-4</sup> | 6.0x10 <sup>-3</sup> | NA             | 1.8 (1.2–2.8)   |
| Replication (LOAD)   | AMP-AD (LOAD)               | 11       | 738       | 7        | 439       | 0.910                | 1.000                | NA             | 0.9 (0.3–2.9)   |
| Replication (All AD) | All Replication Cohorts     | 79       | 2,944     | 44       | 2,767     | 1.5x10 <sup>-3</sup> | 6.0x10 <sup>-3</sup> | NA             | 1.7 (1.1–2.5)   |
| Combined (All AD)    | Discovery + All Replication | 90       | 3,161     | 45       | 3,437     | 2.7x10 <sup>-6</sup> | 1.7x10 <sup>-5</sup> | NA             | 2.2 (1.5–3.2)   |

**Supplemental Table 4: Discovery and replication for private, CADD > 10 coding and non-coding variants in *TET2* (analysis of AD vs. controls).** Related to Table 1. Note that the discovery comparison did not meet the multiple corrections cutoff of  $p < 0.05$ , therefore no formal replication was performed, so all statistics provided here are nominal.

| Cohort Type          | Cohort                      | Cases w/ | Cases w/o | Ctrls w/ | Ctrls w/o | SKAT <i>p</i> | FET <i>p</i>         | Bonf. <i>p</i> | OR (95% CI)    |
|----------------------|-----------------------------|----------|-----------|----------|-----------|---------------|----------------------|----------------|----------------|
| Discovery (FTD)      | UCSF Eur. (FTD)             | 8        | 257       | 1        | 670       | 0.098         | 2.6x10 <sup>-4</sup> | NA             | 20.8 (2.8–922) |
| Replication (FTD)    | UCSF Non-Eur. (FTD)         | 3        | 76        | 1        | 156       | 0.802         | 0.110                | NA             | 6.1 (0.5–325)  |
| Replication (FTD)    | AMP-AD (FTD)                | 4        | 180       | 7        | 439       | 0.877         | 0.739                | NA             | 1.4 (0.3–5.6)  |
| Replication (FTD)    | All Replication Cohorts     | 7        | 256       | 8        | 595       | 0.443         | 0.168                | NA             | 2.0 (0.6–6.5)  |
| Combined (FTD)       | Discovery + All Replication | 15       | 513       | 9        | 1,265     | 0.894         | 9.1x10 <sup>-4</sup> | NA             | 4.1 (1.7–10.7) |
| Replication (ALS)    | Project MinE (ALS)          | 61       | 4,305     | 20       | 1,812     | NA            | 0.391                | NA             | 1.3 (0.8–2.3)  |
| Combined (FTD + ALS) | Combined FTD + ALS          | 76       | 4,818     | 29       | 3,077     | NA            | 0.020                | NA             | 1.7 (1.1–2.7)  |

**Supplemental Table 5: Discovery and replication for private, CADD > 10 coding and non-coding variants in *TET2* (analysis of FTD vs. controls).** Related to Table 1. Note that the discovery comparison did not meet the multiple corrections cutoff of  $p < 0.05$ , therefore no formal replication was performed, so all statistics provided here are nominal.

**Supplemental Table 6:** Case and control counts for all filter sets and genes for the discovery cohort. A header in this file describes how to obtain counts for any desired filter set and gene. See zipped text file.

**Supplemental Table 7:** Qualifying variants in *TET2* from all four cohorts with individual genotype data available. See Excel file.

**Supplemental Table 8: ADNI Cohort Characteristics for Qualifying *TET2* Rare Variant Carriers**

|                                   | <i>TET2</i> Carrier Status |                | P-value |
|-----------------------------------|----------------------------|----------------|---------|
|                                   | Non-Carrier                | Carrier        |         |
| N                                 | 771                        | 15             |         |
| Age (Years; Mean $\pm$ SD)        | 73.2 $\pm$ 7.1             | 77.1 $\pm$ 6.5 | 0.03    |
| Sex (# Male (%))                  | 433 (56.2%)                | 7 (46.7%)      | 0.64    |
| <i>APOE</i> $\epsilon$ 4 Dose (%) |                            |                | 0.81    |
| 0                                 | 451 (58.5%)                | 10 (66.7%)     |         |
| 1                                 | 266 (34.5%)                | 4 (26.7%)      |         |
| 2                                 | 54 (7.0%)                  | 1 (6.7%)       |         |
| Diagnosis (#, %)                  |                            |                | 0.89    |
| CN                                | 266 (34.5%)                | 6 (40.0%)      |         |
| MCI                               | 461 (59.8%)                | 8 (53.3%)      |         |
| AD                                | 44 (5.7%)                  | 1 (6.7%)       |         |
| Education (Years; Mean $\pm$ SD)  | 16.1 $\pm$ 2.8             | 16.3 $\pm$ 2.9 | 0.81    |
| CDRSB Baseline (Mean $\pm$ SD)    | 1.1 $\pm$ 1.3              | 1.0 $\pm$ 1.2  | 0.64    |

CN—Normal Control; MCI – Mild Cognitive Impairment; AD – Alzheimer’s disease; SD – Standard Deviation; CDRSB – Clinical Dementia Rating Sum of Boxes Score.

**Supplemental Table 9: ADNI Cohort Characteristics for *TET2* Loss-of-Function Carriers**

|                                   | <i>TET2</i> LoF Carrier Status |                | P-value |
|-----------------------------------|--------------------------------|----------------|---------|
|                                   | LoF Non-Carrier                | LoF Carrier    |         |
| N                                 | 778                            | 8              |         |
| Age (Years; Mean $\pm$ SD)        | 73.2 $\pm$ 7.1                 | 77.7 $\pm$ 5.7 | 0.08    |
| Sex (# Male (%))                  | 436 (56.0%)                    | 4 (50.0%)      | 1       |
| <i>APOE</i> $\epsilon$ 4 Dose (%) |                                |                | 0.57    |
| 0                                 | 455 (58.5%)                    | 6 (75.0%)      |         |
| 1                                 | 268 (34.4%)                    | 2 (25.0%)      |         |
| 2                                 | 55 (7.1%)                      | 0 (0.0%)       |         |
| Diagnosis (#, %)                  |                                |                | 0.61    |
| CN                                | 270 (34.7%)                    | 2 (25.0%)      |         |
| MCI                               | 463 (59.5%)                    | 6 (75.0%)      |         |
| AD                                | 45 (5.8%)                      | 0 (0.0%)       |         |
| Education (Years; Mean $\pm$ SD)  | 16.1 $\pm$ 2.8                 | 16.5 $\pm$ 2.6 | 0.68    |
| CDRSB Baseline (Mean $\pm$ SD)    | 1.1 $\pm$ 1.3                  | 0.9 $\pm$ 0.7  | 0.59    |

CN—Normal Control; MCI – Mild Cognitive Impairment; AD – Alzheimer’s disease; SD – Standard Deviation; CDRSB – Clinical Dementia Rating Sum of Boxes Score.

## SUPPLEMENTAL ACKNOWLEDGEMENTS

### ADSP:

*The Alzheimer's Disease Sequencing Project (ADSP) is comprised of two Alzheimer's Disease (AD) genetics consortia and three National Human Genome Research Institute (NHGRI) funded Large Scale Sequencing and Analysis Centers (LSAC). The two AD genetics consortia are the Alzheimer's Disease Genetics Consortium (ADGC) funded by NIA (U01 AG032984), and the Cohorts for Heart and Aging Research in Genomic Epidemiology (CHARGE) funded by NIA (R01 AG033193), the National Heart, Lung, and Blood Institute (NHLBI), other National Institute of Health (NIH) institutes and other foreign governmental and non-governmental organizations. The Discovery Phase analysis of sequence data is supported through U01AG047133 (to Drs. Schellenberg, Farrer, Pericak-Vance, Mayeux, and Haines); U01AG049505 to Dr. Seshadri; U01AG049506 to Dr. Boerwinkle; U01AG049507 to Dr. Wijsman; and U01AG049508 to Dr. Goate and the Discovery Extension Phase analysis is supported through U01AG052411 to Dr. Goate, U01AG052410 to Dr. Pericak-Vance and U01 AG052409 to Drs. Seshadri and Fornage. Data generation and harmonization in the Follow-up Phases is supported by U54AG052427 (to Drs. Schellenberg and Wang).*

*The ADGC cohorts include: Adult Changes in Thought (ACT), the Alzheimer's Disease Centers (ADC), the Chicago Health and Aging Project (CHAP), the Memory and Aging Project (MAP), Mayo Clinic (MAYO), Mayo Parkinson's Disease controls, University of Miami, the Multi-Institutional Research in Alzheimer's Genetic Epidemiology Study (MIRAGE), the National Cell Repository for Alzheimer's Disease (NCRAD), the National Institute on Aging Late Onset Alzheimer's Disease Family Study (NIA-LOAD), the Religious Orders Study (ROS), the Texas Alzheimer's Research and Care Consortium (TARC), Vanderbilt University/Case Western Reserve University (VAN/CWRU), the Washington Heights-Inwood Columbia Aging Project (WHICAP) and the Washington University Sequencing Project (WUSP), the Columbia University Hispanic- Estudio Familiar de Influencia Genetica de Alzheimer (EFIGA), the University of Toronto (UT), and Genetic Differences (GD).*

*The CHARGE cohorts are supported in part by National Heart, Lung, and Blood Institute (NHLBI) infrastructure grant HL105756 (Psaty), RC2HL102419 (Boerwinkle) and the neurology working group is supported by the National Institute on Aging (NIA) R01 grant AG033193. The CHARGE cohorts participating in the ADSP include the following: Austrian Stroke Prevention Study (ASPS), ASPS-Family study, and the Prospective*



*Dementia Registry-Austria (ASPS/PRODEM-Aus), the Atherosclerosis Risk in Communities (ARIC) Study, the Cardiovascular Health Study (CHS), the Erasmus Rucphen Family Study (ERF), the Framingham Heart Study (FHS), and the Rotterdam Study (RS). ASPS is funded by the Austrian Science Fond (FWF) grant number P20545-P05 and P13180 and the Medical University of Graz. The ASPS-Fam is funded by the Austrian Science Fund (FWF) project I904), the EU Joint Programme - Neurodegenerative Disease Research (JPND) in frame of the BRIDGET project (Austria, Ministry of Science) and the Medical University of Graz and the Steiermärkische Krankenanstalten Gesellschaft. PRODEM-Austria is supported by the Austrian Research Promotion agency (FFG) (Project No. 827462) and by the Austrian National Bank (Anniversary Fund, project 15435. ARIC research is carried out as a collaborative study supported by NHLBI contracts (HHSN268201100005C, HHSN268201100006C, HHSN268201100007C, HHSN268201100008C, HHSN268201100009C, HHSN268201100010C, HHSN268201100011C, and HHSN268201100012C). Neurocognitive data in ARIC is collected by U01 2U01HL096812, 2U01HL096814, 2U01HL096899, 2U01HL096902, 2U01HL096917 from the NIH (NHLBI, NINDS, NIA and NIDCD), and with previous brain MRI examinations funded by R01-HL70825 from the NHLBI. CHS research was supported by contracts HHSN268201200036C, HHSN268200800007C, N01HC55222, N01HC85079, N01HC85080, N01HC85081, N01HC85082, N01HC85083, N01HC85086, and grants U01HL080295 and U01HL130114 from the NHLBI with additional contribution from the National Institute of Neurological Disorders and Stroke (NINDS). Additional support was provided by R01AG023629, R01AG15928, and R01AG20098 from the NIA. FHS research is supported by NHLBI contracts N01-HC-25195 and HHSN268201500001I. This study was also supported by additional grants from the NIA (R01s AG054076, AG049607 and AG033040 and NINDS (R01 NS017950). The ERF study as a part of EUROSPAN (European Special Populations Research Network) was supported by European Commission FP6 STRP grant number 018947 (LSHG-CT-2006-01947) and also received funding from the European Community's Seventh Framework Programme (FP7/2007-2013)/grant agreement HEALTH-F4-2007-201413 by the European Commission under the programme "Quality of Life and Management of the Living Resources" of 5th Framework Programme (no. QL2-CT-2002-01254). High-throughput analysis of the ERF data was supported by a joint grant from the Netherlands Organization for Scientific Research and the Russian Foundation for Basic Research (NWO-RFBR 047.017.043). The Rotterdam Study is funded by Erasmus Medical Center and Erasmus University, Rotterdam, the Netherlands Organization for Health*

*Research and Development (ZonMw), the Research Institute for Diseases in the Elderly (RIDE), the Ministry of Education, Culture and Science, the Ministry for Health, Welfare and Sports, the European Commission (DG XII), and the municipality of Rotterdam. Genetic data sets are also supported by the Netherlands Organization of Scientific Research NWO Investments (175.010.2005.011, 911-03-012), the Genetic Laboratory of the Department of Internal Medicine, Erasmus MC, the Research Institute for Diseases in the Elderly (014-93-015; RIDE2), and the Netherlands Genomics Initiative (NGI)/Netherlands Organization for Scientific Research (NWO) Netherlands Consortium for Healthy Aging (NCHA), project 050-060-810. All studies are grateful to their participants, faculty and staff. The content of these manuscripts is solely the responsibility of the authors and does not necessarily represent the official views of the National Institutes of Health or the U.S. Department of Health and Human Services.*

*The four LSACs are: the Human Genome Sequencing Center at the Baylor College of Medicine (U54 HG003273), the Broad Institute Genome Center (U54HG003067), The American Genome Center at the Uniformed Services University of the Health Sciences (U01AG057659), and the Washington University Genome Institute (U54HG003079).*

*Biological samples and associated phenotypic data used in primary data analyses were stored at Study Investigators institutions, and at the National Cell Repository for Alzheimer's Disease (NCRAD, U24AG021886) at Indiana University funded by NIA. Associated Phenotypic Data used in primary and secondary data analyses were provided by Study Investigators, the NIA funded Alzheimer's Disease Centers (ADCs), and the National Alzheimer's Coordinating Center (NACC, U01AG016976) and the National Institute on Aging Genetics of Alzheimer's Disease Data Storage Site (NIAGADS, U24AG041689) at the University of Pennsylvania, funded by NIA, and at the Database for Genotypes and Phenotypes (dbGaP) funded by NIH. This research was supported in part by the Intramural Research Program of the National Institutes of Health, National Library of Medicine. Contributors to the Genetic Analysis Data included Study Investigators on projects that were individually funded by NIA, and other NIH institutes, and by private U.S. organizations, or foreign governmental or nongovernmental organizations.*

**ADNI:**

Michael Weiner, MD (UC San Francisco, Principal Investigator, Executive Committee); Paul Aisen, MD (UC San Diego, ADCS PI and Director of Coordinating Center Clinical Core, Executive Committee, Clinical Core Leaders); Ronald Petersen, MD, PhD (Mayo Clinic, Rochester, Executive Committee, Clinical Core Leader); Clifford R. Jack, Jr., MD (Mayo Clinic, Rochester, Executive Committee, MRI Core Leader); William Jagust, MD (UC Berkeley, Executive Committee; PET Core Leader); John Q. Trojanowki, MD, PhD (U Pennsylvania, Executive Committee, Biomarkers Core Leader); Arthur W. Toga, PhD (USC, Executive Committee, Informatics Core Leader); Laurel Beckett, PhD (UC Davis, Executive Committee, Biostatistics Core Leader); Robert C. Green, MD, MPH (Brigham and Women's Hospital, Harvard Medical School, Executive Committee and Chair of Data and Publication Committee); Andrew J. Saykin, PsyD (Indiana University, Executive Committee, Genetics Core Leader); John Morris, MD (Washington University St. Louis, Executive Committee, Neuropathology Core Leader); Leslie M. Shaw (University of Pennsylvania, Executive Committee, Biomarkers Core Leader); Enchi Liu, PhD (Janssen Alzheimer Immunotherapy, ADNI two Private Partner Scientific Board Chair); Tom Montine, MD, PhD (University of Washington) ; Ronald G. Thomas, PhD (UC San Diego); Michael Donohue, PhD (UC San Diego); Sarah Walter, MSc (UC San Diego); Devon Gessert (UC San Diego); Tamie Sather, MS (UC San Diego,); Gus Jiminez, MBS (UC San Diego); Danielle Harvey, PhD (UC Davis); Michael Donohue, PhD (UC San Diego); Matthew Bernstein, PhD (Mayo Clinic, Rochester); Nick Fox, MD (University of London); Paul Thompson, PhD (USC School of Medicine); Norbert Schuff, PhD (UCSF MRI); Charles DeCarli, MD (UC Davis); Bret Borowski, RT (Mayo Clinic); Jeff Gunter, PhD (Mayo Clinic); Matt Senjem, MS (Mayo Clinic); Prashanthi Vemuri, PhD (Mayo Clinic); David Jones, MD (Mayo Clinic); Kejal Kantarci (Mayo Clinic); Chad Ward (Mayo Clinic); Robert A. Koeppe, PhD (University of Michigan, PET Core Leader); Norm Foster, MD (University of Utah); Eric M. Reiman, MD (Banner Alzheimer's Institute); Kewei Chen, PhD (Banner Alzheimer's Institute); Chet Mathis, MD (University of Pittsburgh); Susan Landau, PhD (UC Berkeley); Nigel J. Cairns, PhD, MRCPATH (Washington University St. Louis); Erin Householder (Washington University St. Louis); Lisa Taylor Reinwald, BA, HTL (Washington University St. Louis); Virginia Lee, PhD, MBA (UPenn School of Medicine); Magdalena Korecka, PhD (UPenn School of Medicine); Michal Figurski, PhD (UPenn School of Medicine); Karen Crawford (USC); Scott Neu, PhD (USC); Tatiana M. Foroud, PhD (Indiana University); Steven Potkin, MD UC (UC Irvine); Li Shen, PhD (Indiana University); Faber Kelley, MS, CCRC (Indiana University); Sungeun Kim, PhD (Indiana University); Kwangsik Nho, PhD (Indiana University); Zaven

Kachaturian, PhD (Khachaturian, Radebaugh & Associates, Inc and Alzheimer's Association's Ronald and Nancy Reagan's Research Institute); Richard Frank, MD, PhD (General Electric); Peter J. Snyder, PhD (Brown University); Susan Molchan, PhD (National Institute on Aging/ National Institutes of Health); Jeffrey Kaye, MD (Oregon Health and Science University); Joseph Quinn, MD (Oregon Health and Science University); Betty Lind, BS (Oregon Health and Science University); Raina Carter, BA (Oregon Health and Science University); Sara Dolen, BS (Oregon Health and Science University); Lon S. Schneider, MD (University of Southern California); Sonia Pawluczyk, MD (University of Southern California); Mauricio Beccera, BS (University of Southern California); Liberty Teodoro, RN (University of Southern California); Bryan M. Spann, DO, PhD (University of Southern California); James Brewer, MD, PhD (University of California San Diego); Helen Vanderswag, RN (University of California San Diego); Adam Fleisher, MD (University of California San Diego); Judith L. Heidebrink, MD, MS (University of Michigan); Joanne L. Lord, LPN, BA, CCRC (University of Michigan); Ronald Petersen, MD, PhD (Mayo Clinic, Rochester); Sara S. Mason, RN (Mayo Clinic, Rochester); Colleen S. Albers, RN (Mayo Clinic, Rochester); David Knopman, MD (Mayo Clinic, Rochester); Kris Johnson, RN (Mayo Clinic, Rochester); Rachelle S. Doody, MD, PhD (Baylor College of Medicine); Javier Villanueva Meyer, MD (Baylor College of Medicine); Munir Chowdhury, MBBS, MS (Baylor College of Medicine); Susan Rountree, MD (Baylor College of Medicine); Mimi Dang, MD (Baylor College of Medicine); Yaakov Stern, PhD (Columbia University Medical Center); Lawrence S. Honig, MD, PhD (Columbia University Medical Center); Karen L. Bell, MD (Columbia University Medical Center); Beau Ances, MD (Washington University, St. Louis); John C. Morris, MD (Washington University, St. Louis); Maria Carroll, RN, MSN (Washington University, St. Louis); Sue Leon, RN, MSN (Washington University, St. Louis); Erin Householder, MS, CCRP (Washington University, St. Louis); Mark A. Mintun, MD (Washington University, St. Louis); Stacy Schneider, APRN, BC, GNP (Washington University, St. Louis); Angela Oliver, RN, BSN, MSG ; Daniel Marson, JD, PhD (University of Alabama Birmingham); Randall Griffith, PhD, ABPP (University of Alabama Birmingham); David Clark, MD (University of Alabama Birmingham); David Geldmacher, MD (University of Alabama Birmingham); John Brockington, MD (University of Alabama Birmingham); Erik Roberson, MD (University of Alabama Birmingham); Hillel Grossman, MD (Mount Sinai School of Medicine); Effie Mitsis, PhD (Mount Sinai School of Medicine); Leyla deToledo-Morrell, PhD (Rush University Medical Center); Raj C. Shah, MD (Rush University Medical Center); Ranjan Duara, MD (Wien Center); Daniel Varon, MD (Wien Center); Maria T. Greig, HP

(Wien Center); Peggy Roberts, CNA (Wien Center); Marilyn Albert, PhD (Johns Hopkins University); Chiadi Onyike, MD (Johns Hopkins University); Daniel D'Agostino II, BS (Johns Hopkins University); Stephanie Kielb, BS (Johns Hopkins University); James E. Galvin, MD, MPH (New York University); Dana M. Pogorelec (New York University); Brittany Cerbone (New York University); Christina A. Michel (New York University); Henry Rusinek, PhD (New York University); Mony J de Leon, EdD (New York University); Lidia Glodzik, MD, PhD (New York University); Susan De Santi, PhD (New York University); P. Murali Doraiswamy, MD (Duke University Medical Center); Jeffrey R. Petrella, MD (Duke University Medical Center); Terence Z. Wong, MD (Duke University Medical Center); Steven E. Arnold, MD (University of Pennsylvania); Jason H. Karlawish, MD (University of Pennsylvania); David Wolk, MD (University of Pennsylvania); Charles D. Smith, MD (University of Kentucky); Greg Jicha, MD (University of Kentucky); Peter Hardy, PhD (University of Kentucky); Partha Sinha, PhD (University of Kentucky); Elizabeth Oates, MD (University of Kentucky); Gary Conrad, MD (University of Kentucky); Oscar L. Lopez, MD (University of Pittsburgh); MaryAnn Oakley, MA (University of Pittsburgh); Donna M. Simpson, CRNP, MPH (University of Pittsburgh); Anton P. Porsteinsson, MD (University of Rochester Medical Center); Bonnie S. Goldstein, MS, NP (University of Rochester Medical Center); Kim Martin, RN (University of Rochester Medical Center); Kelly M. Makino, BS (University of Rochester Medical Center); M. Saleem Ismail, MD (University of Rochester Medical Center); Connie Brand, RN (University of Rochester Medical Center); Ruth A. Mulnard, DNSc, RN, FAAN (University of California, Irvine); Gaby Thai, MD (University of California, Irvine); Catherine Mc Adams Ortiz, MSN, RN, A/GNP (University of California, Irvine); Kyle Womack, MD (University of Texas Southwestern Medical School); Dana Mathews, MD, PhD (University of Texas Southwestern Medical School); Mary Quiceno, MD (University of Texas Southwestern Medical School); Ramon Diaz Arrastia, MD, PhD (University of Texas Southwestern Medical School); Richard King, MD (University of Texas Southwestern Medical School); Myron Weiner, MD (University of Texas Southwestern Medical School); Kristen Martin Cook, MA (University of Texas Southwestern Medical School); Michael DeVous, PhD (University of Texas Southwestern Medical School); Allan I. Levey, MD, PhD (Emory University); James J. Lah, MD, PhD (Emory University); Janet S. Cellar, DNP, PMHCNS BC (Emory University); Jeffrey M. Burns, MD (University of Kansas, Medical Center); Heather S. Anderson, MD (University of Kansas, Medical Center); Russell H. Swerdlow, MD (University of Kansas, Medical Center); Liana Apostolova, MD (University of California, Los Angeles); Kathleen Tingus, PhD (University of California, Los

Angeles); Ellen Woo, PhD (University of California, Los Angeles); Daniel H.S. Silverman, MD, PhD (University of California, Los Angeles); Po H. Lu, PsyD (University of California, Los Angeles); George Bartzokis, MD (University of California, Los Angeles); Neill R Graff Radford, MBBCH, FRCP (London) (Mayo Clinic, Jacksonville); Francine Parfitt, MSH, CCRC (Mayo Clinic, Jacksonville); Tracy Kendall, BA, CCRP (Mayo Clinic, Jacksonville); Heather Johnson, MLS, CCRP (Mayo Clinic, Jacksonville); Martin R. Farlow, MD (Indiana University); Ann Marie Hake, MD (Indiana University); Brandy R. Matthews, MD (Indiana University); Scott Herring, RN, CCRC (Indiana University); Cynthia Hunt, BS, CCRP (Indiana University); Christopher H. van Dyck, MD (Yale University School of Medicine); Richard E. Carson, PhD (Yale University School of Medicine); Martha G. MacAvoy, PhD (Yale University School of Medicine); Howard Chertkow, MD (McGill Univ., Montreal Jewish General Hospital); Howard Bergman, MD (McGill Univ., Montreal Jewish General Hospital); Chris Hosein, MD (McGill Univ., Montreal Jewish General Hospital); Sandra Black, MD, FRCPC (Sunnybrook Health Sciences, Ontario); Dr Bojana Stefanovic (Sunnybrook Health Sciences, Ontario); Curtis Caldwell, PhD (Sunnybrook Health Sciences, Ontario); Ging Yuek Robin Hsiung, MD, MHSc, FRCPC (U.B.C. Clinic for AD & Related Disorders); Howard Feldman, MD, FRCPC (U.B.C. Clinic for AD & Related Disorders); Benita Mudge, BS (U.B.C. Clinic for AD & Related Disorders); Michele Assaly, MA Past (U.B.C. Clinic for AD & Related Disorders); Andrew Kertesz, MD (Cognitive Neurology St. Joseph's, Ontario); John Rogers, MD (Cognitive Neurology St. Joseph's, Ontario); Dick Trost, PhD (Cognitive Neurology St. Joseph's, Ontario); Charles Bernick, MD (Cleveland Clinic Lou Ruvo Center for Brain Health); Donna Munic, PhD (Cleveland Clinic Lou Ruvo Center for Brain Health); Diana Kerwin, MD (Northwestern University); Marek Marsel Mesulam, MD (Northwestern University); Kristine Lipowski, BA (Northwestern University); Chuang Kuo Wu, MD, PhD (Northwestern University); Nancy Johnson, PhD (Northwestern University); Carl Sadowsky, MD (Premiere Research Inst (Palm Beach Neurology)); Walter Martinez, MD (Premiere Research Inst (Palm Beach Neurology)); Teresa Villena, MD (Premiere Research Inst (Palm Beach Neurology)); Raymond Scott Turner, MD, PhD (Georgetown University Medical Center); Kathleen Johnson, NP (Georgetown University Medical Center); Brigid Reynolds, NP (Georgetown University Medical Center); Reisa A. Sperling, MD (Brigham and Women's Hospital); Keith A. Johnson, MD (Brigham and Women's Hospital); Gad Marshall, MD (Brigham and Women's Hospital); Meghan Frey (Brigham and Women's Hospital); Jerome Yesavage, MD (Stanford University); Joy L. Taylor, PhD (Stanford University); Barton Lane, MD (Stanford University); Allyson Rosen,

PhD (Stanford University); Jared Tinklenberg, MD (Stanford University); Marwan N. Sabbagh, MD (Banner Sun Health Research Institute); Christine M. Belden, PsyD (Banner Sun Health Research Institute); Sandra A. Jacobson, MD (Banner Sun Health Research Institute); Sherye A. Sirrel, MS (Banner Sun Health Research Institute); Neil Kowall, MD (Boston University); Ronald Killiany, PhD (Boston University); Andrew E. Budson, MD (Boston University); Alexander Norbash, MD (Boston University); Patricia Lynn Johnson, BA (Boston University); Thomas O. Obisesan, MD, MPH (Howard University); Saba Wolday, MSc (Howard University); Joanne Allard, PhD (Howard University); Alan Lerner, MD (Case Western Reserve University); Paula Ogrocki, PhD (Case Western Reserve University); Leon Hudson, MPH (Case Western Reserve University); Evan Fletcher, PhD (University of California, Davis Sacramento); Owen Carmichael, PhD (University of California, Davis Sacramento); John Olichney, MD (University of California, Davis Sacramento); Charles DeCarli, MD (University of California, Davis Sacramento); Smita Kittur, MD (Neurological Care of CNY); Michael Borrie, MB ChB (Parkwood Hospital); T Y Lee, PhD (Parkwood Hospital); Dr Rob Bartha, PhD (Parkwood Hospital); Sterling Johnson, PhD (University of Wisconsin); Sanjay Asthana, MD (University of Wisconsin); Cynthia M. Carlsson, MD (University of Wisconsin); Steven G. Potkin, MD (University of California, Irvine BIC); Adrian Preda, MD (University of California, Irvine BIC); Dana Nguyen, PhD (University of California, Irvine BIC); Pierre Tariot, MD (Banner Alzheimer's Institute); Adam Fleisher, MD (Banner Alzheimer's Institute); Stephanie Reeder, BA (Banner Alzheimer's Institute); Vernice Bates, MD (Dent Neurologic Institute); Horacio Capote, MD (Dent Neurologic Institute); Michelle Rainka, PharmD, CCRP (Dent Neurologic Institute); Douglas W. Scharre, MD (Ohio State University); Maria Katakaki, MD, PhD (Ohio State University); Anahita Adeli, MD (Ohio State University); Earl A. Zimmerman, MD (Albany Medical College); Dzintra Celmins, MD (Albany Medical College); Alice D. Brown, FNP (Albany Medical College); Godfrey D. Pearlson, MD (Hartford Hosp, Olin Neuropsychiatry Research Center); Karen Blank, MD (Hartford Hosp, Olin Neuropsychiatry Research Center); Karen Anderson, RN (Hartford Hosp, Olin Neuropsychiatry Research Center); Robert B. Santulli, MD (Dartmouth Hitchcock Medical Center); Tamar J. Kitzmiller (Dartmouth Hitchcock Medical Center); Eben S. Schwartz, PhD (Dartmouth Hitchcock Medical Center); Kaycee M. Sink, MD, MAS (Wake Forest University Health Sciences); Jeff D. Williamson, MD, MHS (Wake Forest University Health Sciences); Pradeep Garg, PhD (Wake Forest University Health Sciences); Franklin Watkins, MD (Wake Forest University Health Sciences); Brian R. Ott, MD (Rhode Island Hospital); Henry Querfurth, MD (Rhode Island Hospital); Geoffrey Tremont, PhD (Rhode Island

Hospital); Stephen Salloway, MD, MS (Butler Hospital); Paul Malloy, PhD (Butler Hospital); Stephen Correia, PhD (Butler Hospital); Howard J. Rosen, MD (UC San Francisco); Bruce L. Miller, MD (UC San Francisco); Jacobo Mintzer, MD, MBA (Medical University South Carolina); Kenneth Spicer, MD, PhD (Medical University South Carolina); David Bachman, MD (Medical University South Carolina); Elizabeth Finger, MD (St. Joseph's Health Care); Stephen Pasternak, MD (St. Joseph's Health Care); Irina Rachinsky, MD (St. Joseph's Health Care); John Rogers, MD (St. Joseph's Health Care); Andrew Kertesz, MD (St. Joseph's Health Care); Dick Drost, MD (St. Joseph's Health Care); Nunzio Pomara, MD (Nathan Kline Institute); Raymundo Hernando, MD (Nathan Kline Institute); Antero Sarrael, MD (Nathan Kline Institute); Susan K. Schultz, MD (University of Iowa College of Medicine, Iowa City); Laura L. Boles Ponto, PhD (University of Iowa College of Medicine, Iowa City); Hyungsub Shim, MD (University of Iowa College of Medicine, Iowa City); Karen Elizabeth Smith, RN (University of Iowa College of Medicine, Iowa City); Norman Relkin, MD, PhD (Cornell University); Gloria Chaing, MD (Cornell University); Lisa Raudin, PhD (Cornell University); Amanda Smith, MD (University of South Florida: USF Health Byrd Alzheimer's Institute); Kristin Fargher, MD (University of South Florida: USF Health Byrd Alzheimer's Institute); Balebail Ashok Raj, MD (University of South Florida: USF Health Byrd Alzheimer's Institute)
